# Supplementary material
Source: PubMed Central journal article supplement (PMC5349175)
Supplement: mic-01-325-s01.pdf [file mic-01-325-s01.pdf]

## Supplementary material for:

### An ER-localised, extensive, essential and immunogenic glycoprotein family in trypanosomes

Harriet Allison<sup>1</sup>, Amanda J. O'Reilly<sup>1</sup>, Jeremy Sternberg<sup>2</sup> and Mark C. Field<sup>1\*</sup>

<sup>1</sup>Division of Biological Chemistry and Drug Discovery, University of Dundee, Dundee, Scotland, DD1 5EH and <sup>2</sup>School of Biological Sciences, University of Aberdeen, Aberdeen, AB24 2TZ, UK.

**Corresponding author:** Telephone: +44 (0)751-550-7880, email: mcf34@cam.ac.uk

## Figure legends

**Figure S1: Bioinformatic filters for identification of predicted type I *trans*-membrane domain surface membrane proteins.** Firstly, the TREU927 proteome was downloaded from TriTrypDB (<http://tritrypdb.org/tritrypdb/>). All protein sequences were entered into SignalP HMM (<http://www.cbs.dtu.dk/services/SignalP-2.0/>) and those protein sequences containing predicted signal peptides and signal anchors were retained, whilst all others were discarded. Mitprot (<http://ihg.gsf.de/ihg/mitoprot.html>), Predotar (<http://www.hs-ls.pitt.edu/obrc/index.php?page=URL1043959648>) and TargetP (<http://www.cbs.dtu.dk/services/TargetP/>) were then used to remove predicted mitochondrial proteins. Using the output from SignalP HMM, signal sequences were removed and thus the mature protein sequence was generated for all retained protein sequences. These sequences were then entered into TMHMM (<http://www.cbs.dtu.dk/services/TMHMM/>). Finally, GPI-SOM (<http://gpi.unibe.ch>) and big-PI ([http://mendel.imp.ac.at/gpi/gpi\\_server.html](http://mendel.imp.ac.at/gpi/gpi_server.html)) were both used to remove all predicted GPI-anchored proteins. Only one GPI-anchored protein was found in this final output; Tb09.v4.0204. The final cohort of 208 protein IDs was parsed through the publicly available web-based mitochondrial proteome database ([www.TrypsProteome.org](http://www.TrypsProteome.org)), to check for the absence of mitochondrial-targeted proteins. Accession numbers and details for these sequences are available in Table S2.

**Figure S2: Phylogenetic identification of the IGP family.** (A) A neighbour joining tree was generated using ClustalW2. Adenylate cyclases are highlighted in pink, ISG and ISG-like proteins are highlighted in blue and light blue respectively. Those proteins which do not form clusters are highlighted in yellow and referred to as singletons. A family of 20 proteins, invariant glycoproteins (IGPs) are highlighted in green. (B) Phylogenetic analysis of IGPs and ISGs, which demonstrates the distinct nature of these two gene families. The IGP family is further divided into three subfamilies, designated IGP34 (two genes), IGP40 (ten genes) and IGP48 (eight genes), based on molecular weight, presence in all Salivarian trypanosomes and *T. cruzi* and also on possession of N-glycosylation sites.

Sequences from the nearest set of genes from the closer analysis in panel A were used as an out group. (C) Phylogenetic analysis of all retrieved IGP orthologs from a range of kinetoplastid genomes (see methods). *Leishmania* and related species are colour-coded in shades of green, African trypanosomes in shades of red/ochre and south American trypanosomes in shades of blue.

**Figure S3: ClustalW alignment of IGP homologues.** Panel A: Single representatives of the IGP34, 40 and 48 families are shown to illustrate the homology within the N-terminal region. Panel B: Eighty IGP family sequences, from *T. brucei brucei*, *T. brucei gambiense*, *T. vivax*, *T. congolense* and *T. cruzi* were aligned using ClustalW. The alignment was used for building the phylogeny shown in Figure S2C.

**Figure S4: IGP48 is a tomato lectin-binding protein.**  $1 \times 10^7$  BSF cells over-expressing IGP48 full-length protein, IGP48 ectodomain, dTRIM or wild type cells (negative control) were lysed and HA-tagged proteins immunoprecipitated with anti-HA antibody and Dynabeads® Protein G (Life technologies). This was carried out under both native and denaturing conditions (addition of detergent and heating to 95°C). Samples were separated by SDS-PAGE followed by Western blot with TL-biotin conjugate (1:10,000, Vector Laboratories) and streptavidin-HRP (1:10,000, Sigma Aldrich). Membranes were stripped and re-probed with mouse anti-HA monoclonal antibody. Antibody light (~25kDa) and heavy chains (~50kDa) can be seen for all blots. Bands corresponding to HA-tagged proteins are also seen at the correct molecular weight when probed with mouse anti-HA to verify the immunoprecipitation of HA-tagged proteins. To confirm the specificity of immunoprecipitation, wild type BSF cells were lysed and incubated with mouse anti-HA and then Dynabeads under native and denaturing conditions. Following SDS-PAGE, membrane was probed with rabbit polyclonal antibodies against the highly N-glycosylated VSG221. A protein band corresponding to VSG221 was present in the whole cell sample, and no band was observed in the native or denaturing immunoprecipitated samples, indicating that only HA-tagged constructs were isolated in the immunoprecipitation process. The addition of chitin hydrolysate was used to check the carbohydrate specificity of tomato lectin for proteins containing poly-LacNAc units.

**Figure S5: Effects of IGP RNAi on cell cycle progression.** Uninduced and cells that have been induced for 24 hrs were fixed and stained with DAPI. Representative images were taken for cells with normal nuclei and kinetoplast content (1K:1N, 2K:1N, 2K:2N), as well as for cells with abnormal DNA content (0K:1N, 1K:0N, 1K:2N, 0K:2N, K:N  $n > 2$ ). The percentage of cells with this type of DNA content out of 200 cells is indicated for induced and uninduced cells beside each image. All images were captured at the same magnification and scale bar represents 2µm.

**Figure S6: Induction of IGP48 expression in stumpy and stumpy-like cells.** BSF cells ectopically over-expressing HA epitope tagged IGP48 at the C-terminus were incubated at 37°C, 20°C (cold-shock), or in the presence of pCPT-cAMP for 12 hours. A Western blot of

endogenous IGP48 expression levels using rabbit anti-IGP48 antibody (1:100) is shown. Blots were stripped and re-probed with anti-ISG75 whose levels remained unchanged. IGP48 protein levels were determined by densitometry using ImageJ and quantified by normalisation to ISG75. Blots were probed for p67, which is up-regulated in cells treated with pCPT-cAMP and PAD2 (protein associated with differentiation 2), which is under thermoregulated control.

**Figure S7: Visualisation of IGP48 by confocal microscopy.** Cells were fixed and membranes remained intact (not permeabilised), so that incubation with anti-HA antibody stained only HA epitope-tagged proteins on the surface of the cell, if present. A representative image is shown for each condition of a single optical z-section. Confocal z sections were acquired using an SP2-visible inverted confocal microscope (Leica Microsystems GmbH, Germany). Scale bar is 2µm.

**Figure S8: Analysis of glycosylation defects on IGP knockdown.** (A) Whole cell lysates were prepared from p2T7 IGP48 RNAi cell lines cultured in the presence (induced) or absence (uninduced) of tetracycline for 24 hrs and proteins separated by NuPAGE® Bis-Tris Gel System (Invitrogen) using 4-12% gradient acrylamide gels, allowing high resolution separation of proteins. Analysis of protein abundance and molecular weight was carried out using ImageJ, and a line profile plot of grey value (the sum of the grey values of all the pixels in the selection) against distance from top to bottom of the blot was generated. (B) Samples were separated by SDS-PAGE and lectin blots were carried out with *Erythrina cristigalli* (EC; 1:1000) or *Ricinus communis* (RC; 1:1000) lectins conjugated to biotin and then incubated with streptavidin-HRP. A line profile plot, using ImageJ, was generated for each blot. Protein gels were also stained with Coomassie blue stain, to show equal protein loading. Each experiment was performed in duplicate with a representative experiment shown here.

**Figure S9: Analysis of intracellular compartment morphology in IGP48 knockdown cells.** (Left) Visualisation of ER structure and morphology of cells in *T. brucei* stained with TbBiP. (Centre and right) Distribution of VSG221 in permeabilised cells (intracellular VSG, centre) and non-permeabilised cells (surface VSG, right). Intracellular staining with BiP and VSG was visualised with confocal microscopy. Numbers on the panels indicate the period after induction when cells were taken for analysis. Scale bar, 2µm.

**Figure S10: IGP48 knockdown does not induce ATG8-dependant autophagy.** BSF IGP48 RNAi cells transfected with YFP-ATG8.2::GL2166. Cells were induced with tetracycline for 48 hours and fixed, permeabilised and stained with anti-GFP. The number of ATG8-positive puncta were counted for induced and uninduced cells (n = 20) and plotted as a bar graph. Error bars denote standard error of the mean. Knockdown of IGP48 is verified by Western blot, using anti-IGP48 antibody and anti-tubulin as a loading control. A Western blot probed with anti-GFP to verify molecular weight of YFP-ATG8 as 41kDa.

**Table S1: Primer sequences for the verification of RNAi knockdown and localisation studies.** The epitope tag is underlined and restriction sites are shown in bold. Primers are shown in 5' to 3' direction. Designation of primers is shown to the left and restriction sites and epitope tags used are given on the right.

**Table S2: Accession numbers of predicted type I proteins in *T. brucei*.** The accession numbers of all 208 proteins resulting from the bioinformatics search outlined in Fig. S1 are shown in the table.

**Table S3: Serum immunoglobulin responses to IGP48 in *T. b. rhodesiense* patients.** Immunoglobulin G and M responses to recombinant IGP48 detected by Western blotting are recorded as either positive (+) or negative (-). For each patient, disease stage, age and thick film parasitaemia (i.e. Number of Giemsa stained parasites observed per 10 fields, at 400x magnification) are recorded.

*Trypanosoma brucei* predicted proteome (TREU 927)

Tritypdb

**11,412**

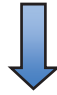

Identification of signal peptide- and signal anchor-containing proteins

SignalP HMM

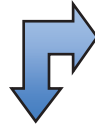

**8,681**

**2,731**

Removal of predicted mitochondrial proteins

Mitoprot, Predotar and TargetP

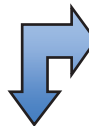

**867**

**1,864**

Generation of mature protein sequences using signal peptide predictions

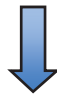

Topology prediction and selection for type I TMD proteins

TMHMM

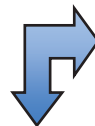

**1,655**

**209**

Removal of predicted GPI-anchored proteins

GPI-SOM and Big-PI

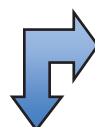

**1** Tb09.v4.0204

**208**

Figure S1

# Figure S2A

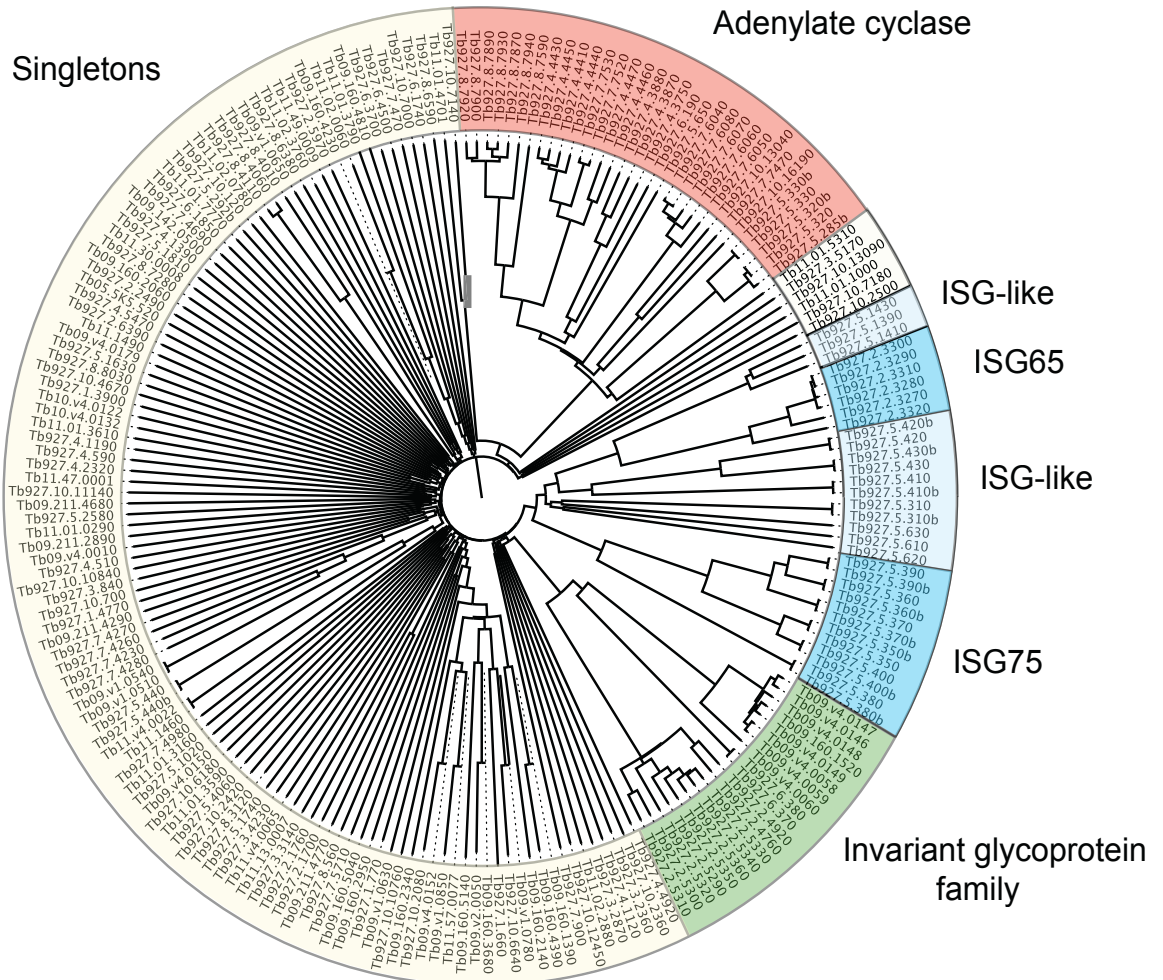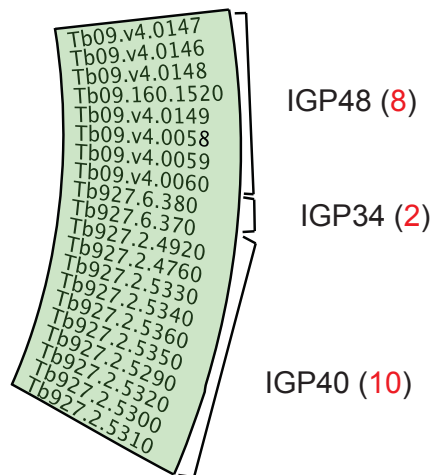

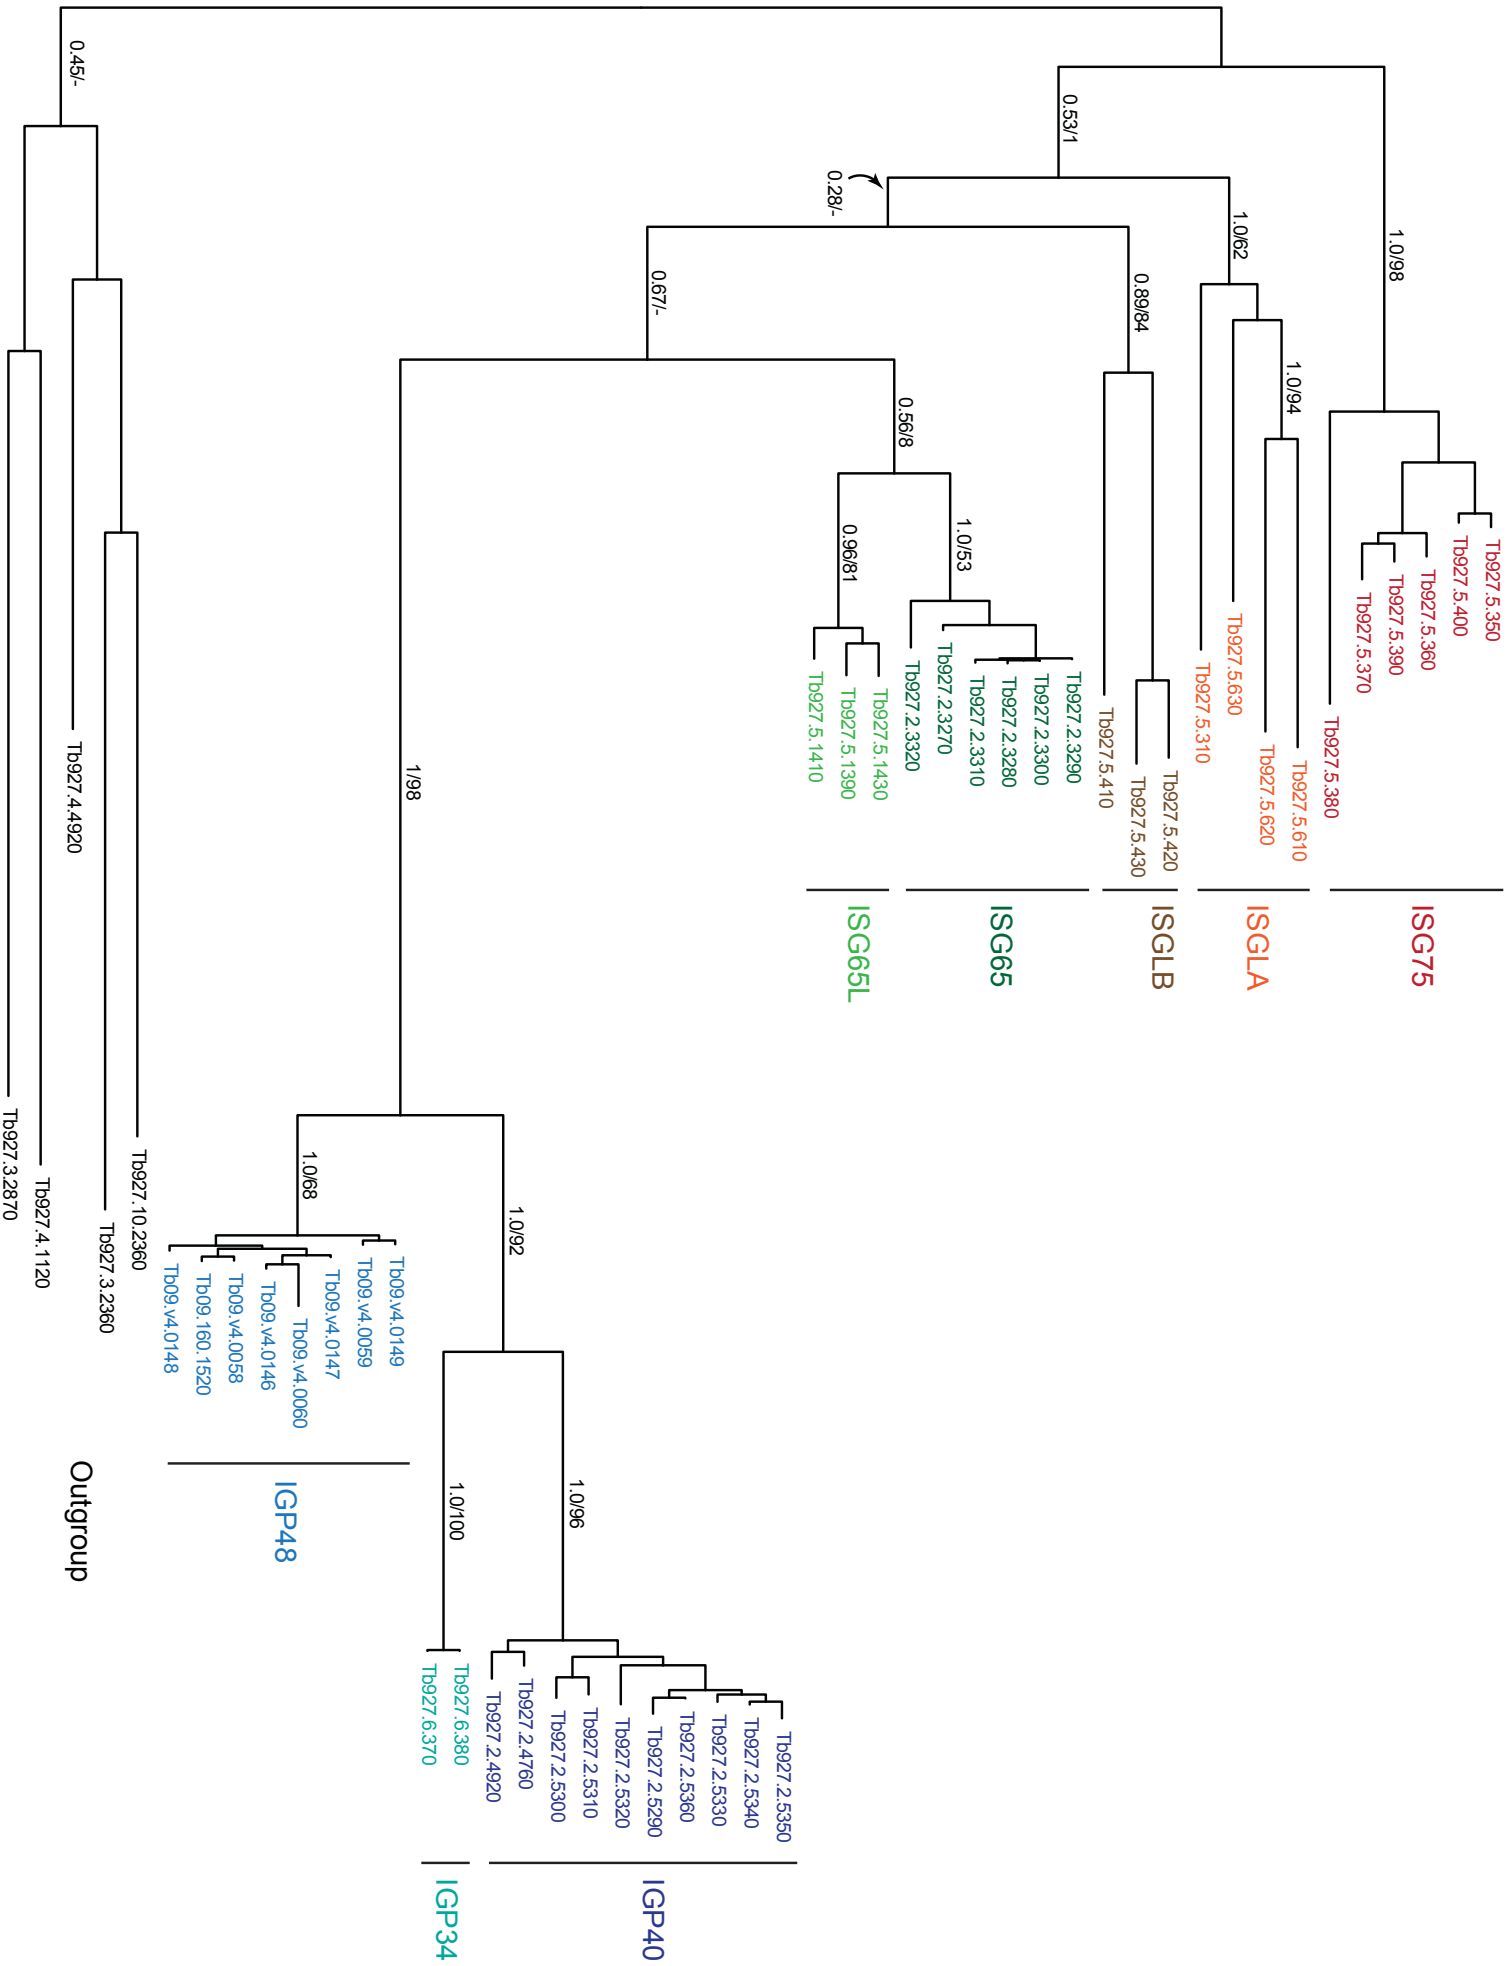

Figure S2B

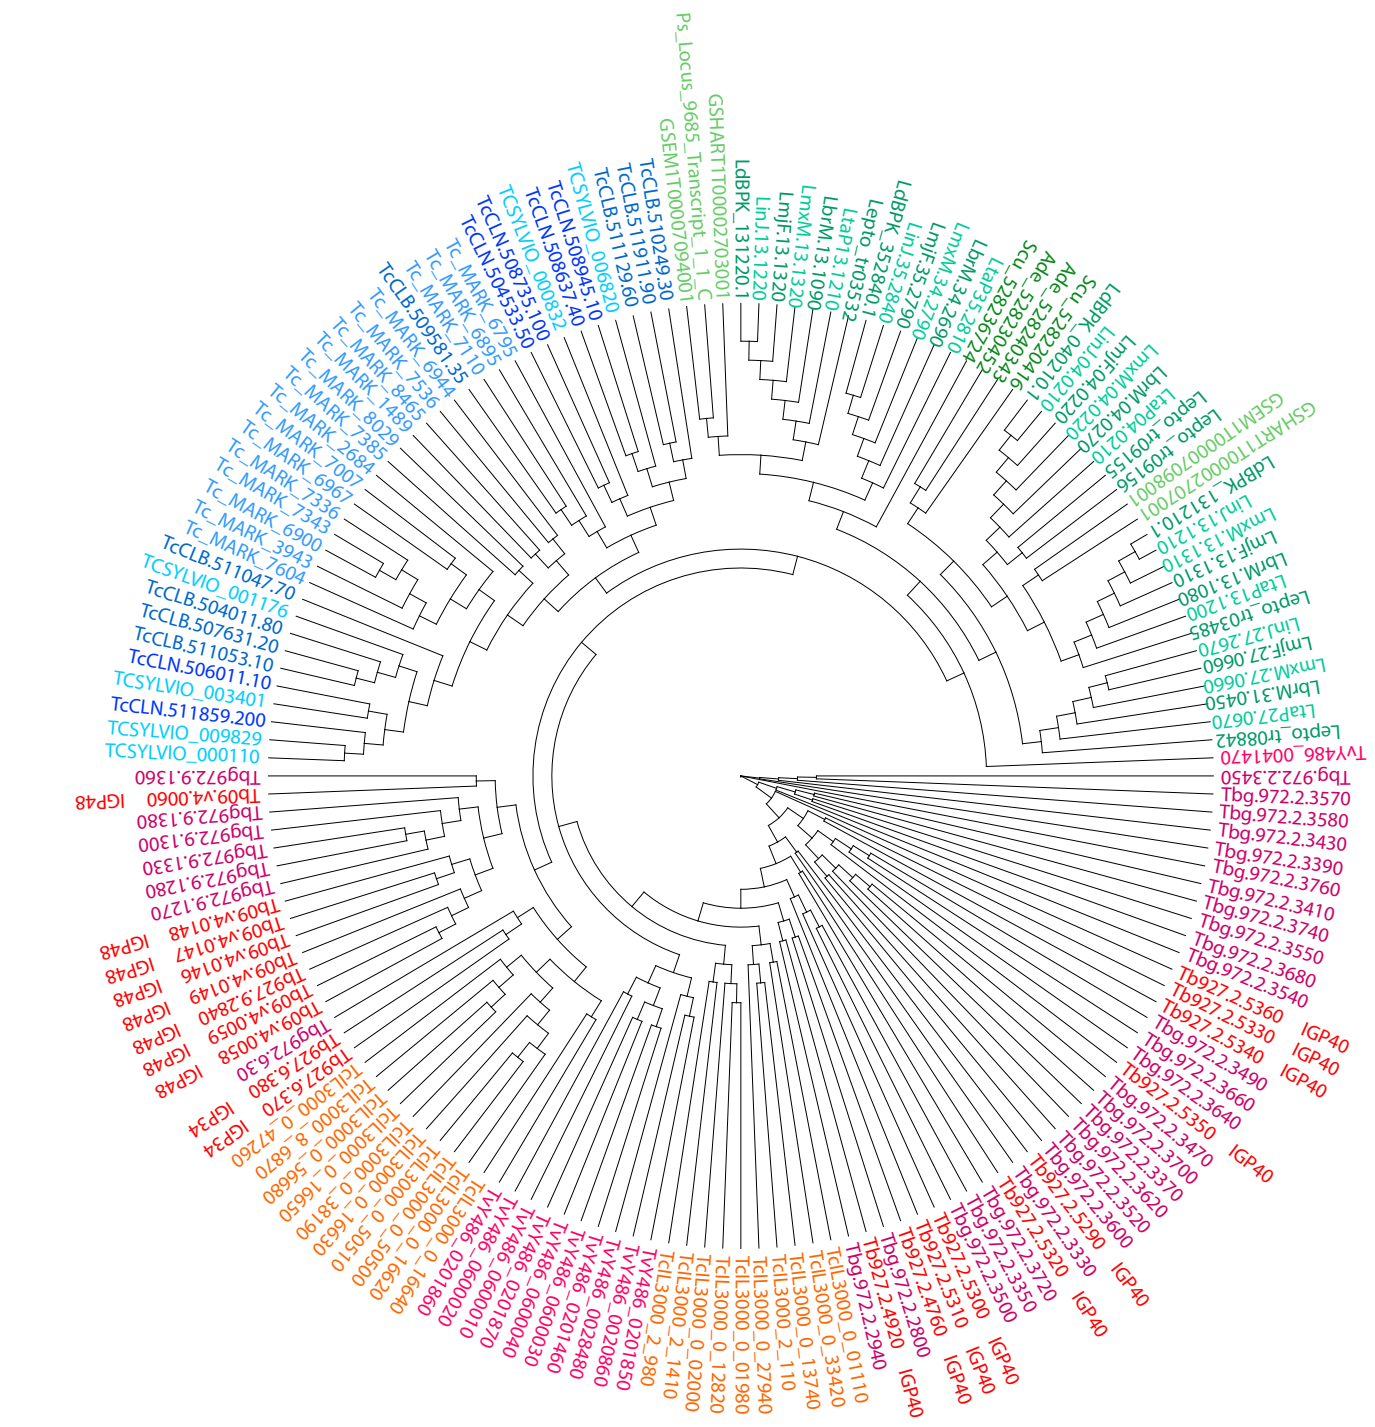

| Species                             | Strain                        |
|-------------------------------------|-------------------------------|
| <i>Angomonas culicis</i>            |                               |
| <i>Strigomonas culicis</i>          |                               |
| <i>Phytomonas EM</i>                |                               |
| <i>Phytomonas HART</i>              |                               |
| <i>Phytomonas serpens</i>           |                               |
| <i>Leishmania donovani</i>          |                               |
| <i>Leishmania infantum</i>          |                               |
| <i>Leishmania major</i>             |                               |
| <i>Leishmania mexicana</i>          |                               |
| <i>Leishmania braziliensis</i>      |                               |
| <i>Leishmania tarentolae</i>        |                               |
| <i>Leptomonas pyrthocoris</i>       |                               |
| <i>Typanosoma gambiense</i>         |                               |
| <i>Typanosoma brucei</i>            |                               |
| <i>Typanosoma congolense</i>        |                               |
| <i>Typanosoma vivax</i>             |                               |
| <i>Typanosoma cruzi marinkellei</i> | B7                            |
| <i>Typanosoma cruzi</i>             | TSyVio                        |
| <i>Typanosoma cruzi</i>             | CL Brener Esmeraldo like      |
| <i>Typanosoma cruzi</i>             | ICL Brener Non-Esmeraldo like |

Figure S2C



```
1 CLUSTAL 2.1 multiple sequence alignment
2
3
4 Tb09.v4.0147 --MEIRMVPSNFSRITTLCGILMLLQCILRPLQAASSGGGPVTTAAKSyaiYTHEVFENN
5 Tb927.6.380 MGTEISMTACGFARMVVLFF--TALLQCLSGSSHLFAFGKVYPTAYVKEYILFPNRKFWHG
6 Tb927.2.5290 MSM DTRMVNFGFTRAALLCG-LLLLLTAVCPLHVTAADNGRVIVNVKSYFSMDNFAFAHR
7 : * . .*:* . * ** . : : . . .*.* : * :
8
9 Tb09.v4.0147 GVYNVDYVNSERVCRAEGMNLATDHSEATNSLIYKLLKPKNKLGYLYAYLGGDAKYSASS
10 Tb927.6.380 GDYLVVDYSNSVHICREAGGTLATDHSQATNERLTAYHLGVADGPFiYSYLGGDATYSASA
11 Tb927.2.5290 GNYFVSYKNAAYCGDNGAVLPADQTEAAHQSLQSAIKRVITGSDAFSYLGGDAVYSSGE
12 * * *.* * : * * * .:*:::*::: : :***** **:.
13
14 Tb09.v4.0147 VHEEKDRCKVGD LASSLNCVYRWNTGLFAPATPDDNGVAFWRGSYYEVTGAGSMNDYPSF
15 Tb927.6.380 AQDAGIRCTAGDYDTSLNCVYRWNSGLFEASGIEGNGVAFWRGSYTYKSGSGALGGYPSF
16 Tb927.2.5290 AIEADKRCKPGDAASSRYCVYRWNKGLFAKALPDGQGVAFWRGSYVVKYGAASMNGYPSF
17 . : **.* * :* *****.* ** : :.:***** *.:.:.****
18
19 Tb09.v4.0147 FEN-YPAYGRLNVIAKLD-SSDRVTWFDDDDDFGNNISFTNTRARSTRFFMVLCEASAVP
20 Tb927.6.380 FAQSY PQDQLHVMGWYTNVTKWFGWFDGGEVSGNKPGGKAPGYKSLTYFAALCEVT-VP
21 Tb927.2.5290 WGSEYPKRGQLYTL SWYHTGDDVTTWYDGKDMSGRIKWASDNPDKTENYVILCEVHDSI
22 : . ** *:* :.. . *:* : * . . : ***.
23
24 Tb09.v4.0147 TPLPPASPHSENTTADENTTVDENTTVDENTTADENTTADENTTVDENTTADENTTADEN
25 Tb927.6.380 QPSHPVPGNGNSTANEELAVINESLHSD-----
26 Tb927.2.5290 STTTTTTTTTTTTTTTTTTAAPASGEVPEP-----
27 . ... .*: :. . *
28
29 Tb09.v4.0147 TTADENTTVDENTTADENTTVDENTTVDENTTVDENTNADEISNGSNEASDKTVPSTASD
30 Tb927.6.380 -----ESTNSQDQPSATPKPKGEAETTLTSLSHITICVGG-----
31 Tb927.2.5290 -----TVTKDEEVTVT-----TVSLEERSNWHIILIA-----
32 ... ::: :. ::: . :.
33
34 Tb09.v4.0147 GEGSGGGAGA AVVIIFILLAVLLILLYFCCFAGHEKYITVMSLREKVTSPVSNVEAAEVA
35 Tb927.6.380 -----ELCLLIVFFSLAIVC-----
36 Tb927.2.5290 -----LISVSLIVLLLFLLRWFCDYDVKKEIIPMTLREVVGEPLFVLEPTPFV
37 :: :. :::
38
39 Tb09.v4.0147 AVPSNGEEHLSITSHQQETPAADE
40 Tb927.6.380 -----
41 Tb927.2.5290 PPEGFAAPPLALQYYNQ MRTSE--
42
43
```

# Figure S3B

## CLUSTAL W (1.8) multiple sequence alignment

```
Tbg97291330 -----
Tbg97291280 -----
Tbg97291270 -----
Tbg97291300 -----
Tb09v40146 -----
Tb09v40147 -----
Tb091601520 -----
Tb09v40149 -----
Tb09v40059 -----
Tb09v40058 -----
Tb09v40148 -----
Tbg97291380 -----
Tb09v40060 -----
Tbg97291360 -----
Tc00104705351105310 -----
Tc00104705350763120 -----
Tc00104705350401180 -----
Tc001047053511859200 -----
Tc00104705350601110 -----
Tc00104705351104770 -----
Tc00104705350453350 -----
Tc001047053508735100 -----
Tc0010475350894510 -----
Tc00104705350863740 -----
Tc00104705351112960 -----
Tc00104705351191190 -----
Tc00104705351024930 -----
Tc00104705350735910 -----
TvY486_0201870 -----
TvY486_0600050 -----
TvY486_0028480 -----
TvY486_0201850 -----
Tbg97223580 -----
Tbg97223450 -----
Tbg97223390 -----
Tbg97223430 -----
Tbg97223760 -----
Tbg97223550 -----
Tbg97223410 -----
Tbg97223680 -----
Tbg97223740 -----
Tbg97223540 -----
Tb92725360 -----
Tb92725340 -----
Tb92725330 -----
Tbg97223600 -----
Tbg97223520 -----
Tbg97223370 -----
Tbg97223470 -----
Tbg97223700 -----
Tbg97223620 -----
Tbg97223490 -----
Tbg97223660 -----
Tbg97223640 -----
Tb92725350 -----
Tbg97223330 -----
Tb92725290 -----
Tbg97223720 -----
Tb92725320 -----
Tbg97223350 -----
Tbg97223500 -----
Tb92725300 -----
Tb92725310 -----
Tbg97222800 -----
Tb92724760 -----
Tbg97222940 -----
Tb92724920 -----
TcIL30002110 MVCCTIIIT----I I I I S L L C L S E V K C S Y S L S V C G G R C C Y V L C R V T A Y G V F L L R E Y C S P S
TcIL3000013740 MVCCTIIIT----I I I I S L L C L S E V K C S Y S L S V C G G R C C Y V L C R V T A Y G V F L L R E Y C S P L
TcIL3000027940 MVCCTIIIT----I I I I S L L C L S E V K C S Y S L S V C G G R C C Y V L C R V T A Y G V F L L R E Y C S P S
TcIL3000001110 -----M F H C A L S
TcIL3000033420 MVCCTIIIT I I I I I I I I I I I I I I S L L C L S E V K C S Y S L S T C G G R C C Y V L C R V T A C G V F L L R E Y C S P S
Tb9276380 -----
Tbg972630 -----
Tb9276370 -----
```

TcIL3000050510 -----  
TcIL3000050500 -----  
TcIL3000016620 -----  
TcIL3000016630 -----  
TcIL3000047260 -----

Tbg97291330 -----  
Tbg97291280 -----  
Tbg97291270 -----  
Tbg97291300 -----  
Tb09v40146 -----  
Tb09v40147 -----  
Tb091601520 -----  
Tb09v40149 -----  
Tb09v40059 -----  
Tb09v40058 -----  
Tb09v40148 -----  
Tbg97291380 -----  
Tb09v40060 -----  
Tbg97291360 -----  
Tc00104705351105310 -----  
Tc00104705350763120 -----  
Tc00104705350401180 -----  
Tc001047053511859200 -----  
Tc00104705350601110 -----  
Tc00104705351104770 -----  
Tc00104705350453350 -----  
Tc001047053508735100 -----  
Tc0010475350894510 -----  
Tc00104705350863740 -----  
Tc00104705351112960 -----  
Tc00104705351191190 -----  
Tc00104705351024930 -----  
Tc00104705350735910 -----  
TvY486\_0201870 -----  
TvY486\_0600050 -----  
TvY486\_0028480 -----  
TvY486\_0201850 -----  
Tbg97223580 -----  
Tbg97223450 -----  
Tbg97223390 -----  
Tbg97223430 -----  
Tbg97223760 -----  
Tbg97223550 -----  
Tbg97223410 -----  
Tbg97223680 -----  
Tbg97223740 -----  
Tbg97223540 -----  
Tb92725360 -----  
Tb92725340 -----  
Tb92725330 -----  
Tbg97223600 -----  
Tbg97223520 -----  
Tbg97223370 -----  
Tbg97223470 -----  
Tbg97223700 -----  
Tbg97223620 -----  
Tbg97223490 -----  
Tbg97223660 -----  
Tbg97223640 -----  
Tb92725350 -----  
Tbg97223330 -----  
Tb92725290 -----  
Tbg97223720 -----  
Tb92725320 -----  
Tbg97223350 -----  
Tbg97223500 -----  
Tb92725300 -----  
Tb92725310 -----  
Tbg97222800 -----  
Tb92724760 -----  
Tbg97222940 -----  
Tb92724920 -----  
TcIL30002110 ATCPLYYYYFFRDVSLCVELSLFSLPRCSACAGVHRSHCAFDVLP PPPRSLLSPPDSPEQ  
TcIL3000013740 ATCPLYYYYFFRDVSLCVELSLFSLPRCSACAGVHRSHCAFDVLP PPPRSLLSPPDSPEQ  
TcIL3000027940 ATCPLYYYYFFRDVLLCVELSLFSLPRCSACAGVHRSHCAFDVLP PPPRSLLSPPDSPEQ  
TcIL3000001110 SS-----YHFPAALPVLAFGTGAIATFDVLP PPTRSLLSPPDSPEQ  
TcIL3000033420 ATRLYYYYFFRDVSLCVELFLFSLPRCSACAGVHRGHCASDVLP PPSHRSLLSPPDSPEQ

Tb9276380 -----  
Tbg972630 -----  
Tb9276370 -----  
TcIL3000050510 -----  
TcIL3000050500 -----  
TcIL3000016620 -----  
TcIL3000016630 -----  
TcIL3000047260 -----  
  
Tbg97291330 -----MEIRMVPSNFSTR---ITTLCG-----VLMLLQCILRPLQAASSGG----G  
Tbg97291280 -----MEIRMVPSNFSTR---ITTLCG-----ILMLLQCILRPLQAASSGG----G  
Tbg97291270 -----MEIRMVPSNFSTR---ITTLCG-----VLMLLQCILRPLQAASSGG----G  
Tbg97291300 -----MEIRMVPSNFSTR---ITTLCG-----VLMLLQCILRPLQAASSGG----G  
Tb09v40146 -----MEIRMVPSNFSTR---ITTLCG-----ILMLLQCILRPLQAASSGG----G  
Tb09v40147 -----MEIRMVPSNFSTR---ITTLCG-----ILMLLQCILRPLQAASSGG----G  
Tb091601520 -----MEIRMVPSNFSTR---ITTLCG-----ILMLLQCILRPLQAASSGG----G  
Tb09v40149 -----MEIRMVPSNFSTR---ITTLCG-----ILMLLQCILRPLQAASSGG----G  
Tb09v40059 -----MEIRMVPSNFSTR---ITTLCG-----ILMLLQCFRPLQAASSGG----G  
Tb09v40058 -----MEIRMVPSNFSTR---ITTLCG-----ILMLLQCILRPLQAASSGG----G  
Tb09v40148 -----MEIRMVPSNFSTR---ITTLCG-----ILMLLQCILRPLQAASSGG----G  
Tbg97291380 -----MEIRMVPSNFSTR---ITTLCG-----VLMLLQCILRPLQAASSGG----G  
Tb09v40060 -----MEIRMVPSNFSTR---ITTLCG-----ILMLLQCFRPLQAASSGG----G  
Tbg97291360 -----MEIRMVPSNFSTR---ITTLCG-----ILMLLQCILRPLQAASSGG----G  
Tc00104705351105310 ---MEFEAMGIRTRSATR---NAVRWM-----VLFLLQLYLGSHPSFTAAGE---EEK  
Tc00104705350763120 ---MEFEAMGIRTRSATR---NAVRWM-----VLFLLQLYLGSHPSFTAAGE---EEK  
Tc00104705350401180 -----MGIRMSATR---NAVRWM-----VLFLLQLYLGSHPSFTAAGE---EEK  
Tc001047053511859200 ---MEAEAMGIRTRSATR---NAVRWM-----VLFLLQLYLGSHPSFTAAG---EE  
Tc00104705350601110 ---MEAEAMGIRTRSATR---NAVRWM-----VLFLLQLYLGSHPSFTAAGE---EEK  
Tc00104705351104770 ---MESEAMGIRTRSATR---NAVRWM-----VLFLLQLYLGSHPSFTAAGE---EEK  
Tc00104705350453350 ---MEVELMGMRTSATR---NAVRWM-----VLFLLQLYLGSHPSFTAAGEEEEEG  
Tc001047053508735100 ---MEVELMGMRTSATR---NAVRWM-----VLFLLQLYLGSHPSFTAAGEEEEEG  
Tc00104705350894510 ---MEVELMCMRTSATR---NAVRWM-----VLFLLMQLYLGSHPSFTAAGEKEEEG  
Tc00104705350863740 ---MEVELMCMRTSATR---NAVRWM-----VLFLLMQLYLGSHPSFTAAGEEEKG  
Tc00104705351112960 ---MEVEFLGMRTSATR---NAVRWM-----VLFLLQLYLGSHPSFTAAGSVEEG  
Tc00104705351191190 ---MEVEFLGMRTSATR---NAVRWT-----VLFLLQLYLGSHPSFTAAGKVEEG  
Tc00104705351024930 ---MEVEFLGMRTSATR---NAVRWM-----VLFLLQLYLGSHPSFTAAGKVEEG  
Tc00104705350735910 ---MEFEAMGIRTRSATR---NAVRWM-----VLFLLQLYLGSHPSFTAAGKVEEG  
-----  
TvY486\_0201870 -----  
TvY486\_0600050 -----  
TvY486\_0028480 -----MTTDARARTAACVR---TAGAWP-----LLLLLCVHVAVHARLASAE---DG  
TvY486\_0201850 -----MTTDARARTAACVR---TAGAWP-----LLLLLCVHVACHARLASAE---DG  
Tbg97223580 ---MSMDTRMGSGFTR---AALLCG-----LLLLLTAVCPLHVS---AADGD---DG  
Tbg97223450 ---MSMDTRMVSGFTR---AALLCG-----LLLLLTAVCPLHVS---AADGD---DG  
Tbg97223390 ---MSMDTRMVSGFTR---AALLCG-----LLLLLTAVCPLHVS---AADGD---DG  
Tbg97223430 ---MSMDTRMVSGFTR---AALLCG-----LLLLLTAVCPLHVS---AADGD---DG  
Tbg97223760 ---MSMDTRMVSGFTR---AALLCG-----LLLLLTAVCPLHVS---AADGD---DG  
Tbg97223550 ---MSMDTRMVSGFTR---AALLCG-----LLLLLTAVCPLHVS---AADGD---DG  
Tbg97223410 ---MSMDTRMVSGFTR---AALLCG-----LLLLLTAVCPLHVS---AADGD---DG  
Tbg97223680 ---MSMDTRMVSGFTR---AALLCG-----LLLLLTAVCPLHVS---AADGD---DG  
Tbg97223740 ---MSMDTRMVSGFTR---AALLCG-----LLLLLTAVCPLHVS---AADGD---DG  
Tbg97223540 ---MSMDTRMVSGFTR---AALLCG-----LLLLLTAVCPLHVF---AADGD---DG  
Tb92725360 ---MSMDTRMVNFGFTR---AALLCG-----ILLLLAVCPLHVT---AADGD---DG  
Tb92725340 ---MSMDTRMVNFGFTR---AALLCG-----ILLLLAVCSLHVT---AADGD---DG  
Tb92725330 ---MSMDTRMVNFGFTR---AALLCG-----ILLLLAVCSLHVT---AADGD---DG  
Tbg97223600 ---MSMDTRMVNFGFTR---AALLCG-----ILLLLAVCPLHVT---AADGD---DG  
Tbg97223520 ---MSMDTRMVNFGFTR---AALLCG-----ILLLLAVCPLHVT---AADGD---DG  
Tbg97223370 ---MSMDTRMVNFGFTR---AALLCG-----LLLLLTAVCPLRVT---AADGD---DG  
Tbg97223470 ---MSMDTRMVNFGFTR---AALLCG-----LLLLLTAVCPLRVT---AADGD---DG  
Tbg97223700 ---MSMDTRMVNFGFTR---AALLCG-----LLLLLTAVCPLRVT---AADGD---DG  
Tbg97223620 ---MSMDTRMVNFGFTR---AALLCG-----LLLLLTAVCPLRVT---AADGD---DG  
Tbg97223490 ---MSMDTRMVSGFTR---AALLCG-----LLLLLTAVCPLRVT---AADGD---DG  
Tbg97223660 ---MSMDTRMVSGFTR---AALLCG-----LLLLLTAVCPLRVT---AADGD---DG  
Tbg97223640 ---MSMDTRMVSGFTR---AALLCG-----LLLLLTAVCPLRVT---AADGD---DG  
Tb92725350 ---MSMDTRMVNFGFTR---AALLCG-----LLLLLTAVCPLHVT---AADGD---DG  
Tbg97223330 ---MSMDTRMVNFGFTR---AALLCG-----LLLLLTAVCPLHVT---AADGD---DG  
Tb92725290 ---MSMDTRMVNFGFTR---AALLCG-----LLLLLTAVCPLHVT---AAD---NG  
Tbg97223720 ---MSMDTRMVSGFTR---AALLCG-----LLLLLTAVCPLHVS---AADGD---DG  
Tb92725320 ---MSMDTRMVNFGFTR---AALLCG-----ILLLLAVCSLHVTAAADGD---DG  
Tbg97223350 ---MSMDTRMVNFGFTR---AALLCG-----LLLLLTAVCPLHVT---AAADD---NG  
Tbg97223500 -----MVNFGFTR---AALLCG-----LLLLLTAVCPLHVT---AADD---NG  
Tb92725300 ---MSMDTRMVNFGFTR---AALLCG-----LLLLLTAVCPLHVT---AADGD---NG  
Tb92725310 ---MSMDTRMVNFGFTR---AALLCG-----ILLLLAVCPLHVT---AADGD---G  
Tbg97222800 ---MSMDTRMVNFGFTR---AALLCG-----ILLLLAVCPLHVT---AADGI---DG  
Tb92724760 ---MSMDTRMVNFGFTR---AALLCG-----ILLLLAVCSLHVT---AADGD---DG  
Tbg97222940 -----MDTRMVNFGFTR---AALLCG-----ILLLLAVCPLHVT---AAADD---DG  
Tb92724920 ---MSMDTRMVNFGFTR---AALLCG-----ILLLLAVCPLHVT---AADDD---DG  
TcIL30002110 RKKEISKQAKISKTTMSSGRNALFACGAILRAVVA-LLLLQCVGRPLCLTASAT-----E  
TcIL3000013740 RKKEISKQAKISKTTMSSGRNALFACGAILRAVVA-LLLLQCVGRPLCLTASAT-----E

TcIL3000027940 RKKEISKQAKISKTTMSSGRNALFACGAILRAVVA-LLLLQCVGRPLCLTASAT-----E  
TcIL3000001110 RKKEISKTKISKTTMSPGRNALFSCGTILRAVVALLLLLQCVGRPLCLTASAT-----E  
TcIL3000033420 RKKEISKKAKISKTTMSPGRNALFACGAILRAVVA-LLLLQCVGRPLCLTASAD-----E  
Tb9276380 ----MGTEISMTACGFAR---MVLVFT-----ALL-QCLSGSSHLFAFGK-----V  
Tbg972630 ----MGTEISMTACGFAR---MVLVFT-----ALL-QCLSGSSHLFAFGK-----V  
Tb9276370 ----MGTEISMTACGFAR---MVLVFT-----ALL-QCLSGSSHLFAFGK-----V  
TcIL3000050510 -----  
TcIL3000050500 -----MSKGTHA---APYALV-----LAL-LCVVHPLQVAVVAQ-----P  
TcIL3000016620 -----MSKGTHA---APYALV-----LVL-LCVVHPLQVAVVAQ-----P  
TcIL3000016630 -----MSKGTHA---TPCALV-----LVL-LCVVHPLQMAVSAK-----E  
TcIL3000047260 -----MSKGTHA---VPHVLV-----MAL-LCVVHPLQVAASAK-----E

Tbg97291330 PVTAAKSYAIYTHEVFENNGVYVNDYVNSERVCR AEGMNLATDHSEATNSLIYKLLKPK  
Tbg97291280 PVTAAKSYAVYTHEVFENNGVYVNDYVNSERVCR AEGMNLATDHSEATNSLIYKLLKPK  
Tbg97291270 PVTAAKSYAIYTHEVFENNGVYVNDYVNSERVCR AEGMNLATDHSEATNSLIYKLLKPK  
Tbg97291300 PVTAAKSYAIYTHEVFENNGVYVNDYVNSERVCR AEGMNLATDHSEATNSLIYKLLKPK  
Tb09v40146 PVTAAKSYAVYPHEVFENNGVYVNDYVNSERVCR AEGMNLATDHSEATNSLIYKLLKPK  
Tb09v40147 PVTAAKSYAIYTHEVFENNGVYVNDYVNSERVCR AEGMNLATDHSEATNSLIYKLLKPK  
Tb091601520 PVTAAKSYAIYTHEVFENNGVYVNDYVNSERVCR AEGMNLATDHSEATNSLIYKLLKPK  
Tb09v40149 PVTAAKSYAVYPHEVFENNGVYVNDYVNSERVCR AEGMNLATDHSEATNSLIYKLLKPK  
Tb09v40059 PVTAAKSYAVYPHEVFENNGVYVNDYVNSERVCR AEGMNLATDHSEATNSLIYKLLKPK  
Tb09v40058 PVTAAKSYAVYPHEVFENNGVYVNDYVNSERVCR AEGMNLATDHSEATNSLIYKLLKPK  
Tb09v40148 PVTAAKSYAIYTHEVFENNGVYVNDYVNSERVCR AEGMNLATDHSEATNSLIYKLLKPK  
Tbg97291380 PVTAAKSYAVYPHEVFENNGVYVNDYVNSERVCR AEGMNLATDHSEATNSLIYKLLKPK  
Tb09v40060 PVTAAKSYAIYTHEVFENNGVYVNDYVNSERVCR AEGMNLATDHSEATNSLIYKLLKPK  
Tbg97291360 PVTAAKSYAIYTHEVFENNGVYVNDYVNSERVCR AEGMNLATDHSEATNSLIYKLLKPK  
Tc00104705351105310 HVTIGITKYFHHANSIFSSNFGGRVDYTN SQVSCFN GGGLLASDQTPAAHISIAAQLREL  
Tc00104705350763120 HVTIGITKYFHHANSIFSSNFGGRVDYTN SQVSCFN GGGLLASDQTPAAHISIAAQLREL  
Tc00104705350401180 HVTIGITKYFHHANSIFSSNFGGRVDYTN SQVSCFN GGGLLASDQTPAAHISIAAQLREL  
Tc001047053511859200 HVTIGITKYFHHANSIFKTNFATRVDTNSQV SCFN GGGLLASDQTPAAHISIAAELRKL  
Tc00104705350601110 HVTIGITKYFHHANSIFSSNFGGRVDYTN SQVSCFN GGGLLASDQTPAAHISIAAQLREL  
Tc00104705351104770 HVTIVITKYFHHANSIFSSNFGGRVDYTN SQVSCFN GGGLLASDQTPAAHVSIAAELREL  
Tc00104705350453350 HVVIEIVKYFNYPNSIFFQNYAGDVS YFSSDDVCH LGGVLSADQTPAAHVAIADEL RKT  
Tc001047053508735100 HVVIEIVKYFNYPNSIFFQNYAGDVS YFSSDDVCH LGGVLSADQTPAAHVAIADEL RKT  
Tc0010475350894510 HVVIEIVRYFHYSNPIFFDNYAGDVS YFSSDDVCH LGGVLSADQTPAAHAAIADEL RKT  
Tc00104705350863740 NVVIEIVKYFHYSNPIFFDNYAGDVS YFSSDDVCH LGGVLSADQTPAAHVAIADEL RKT  
Tc00104705351112960 HVAIEIVRYFHYANPIFFENYAGDVS YFSSDDACH LGGVLSADQTPAAHVAIAGEL RKT  
Tc00104705351191190 HVVIEIVKYFHYANPIFFENYAGDVS YFSSDDACH LGGVLSADQTPAAHVAIAGEL RKT  
Tc00104705351024930 HVVIEIVKYFHYANPIFFENYAGDVS YFSSDDACH LGGVLSADQTPAAHVAIAGEL RKT  
Tc00104705350735910 HVAIEIVKYFHYANPIFFENYAGDVS YFSSDDVCH LGGVLSADQTPAAHVAIADEL RKT  
TvY486\_0201870 -----REAGAVLAADQSR AAKKAILQR FYAR  
TvY486\_0600050 -----  
TvY486\_0028480 RVTVNVKRYLSLPSSEGFRTQAH RVDYSSDR LCREAGAVLAADQSR AAKKAILQFHVL  
TvY486\_0201850 RVTVNVRRYLSLPSSEFRTAYDQRVDYSSDR LCREAGAVLAADQSDAAHKAIFDQFHSY  
Tbg97223580 RVIVNVKEYFSMPNRAFIRDGEYHVSYN ANAYCGDNGAVLPADQTEAAHQSLQDAMKRV  
Tbg97223450 RVIVNVKEYFSMPNRAFIRDGEYHVSYN ANAYCGDNGAVLPADQTEAAHQSLQDAMKRV  
Tbg97223390 RVIVNVKEYFSMPNRAFIRDGEYHVSYN ANAYCGDNGAVLPADQTEAAHQSLQDAMKRV  
Tbg97223430 RVIVNVKEYFSMPNRAFIRDGEYHVSYN ANAYCGDNGAVLPADQTEAAHQSLQDAMKRV  
Tbg97223760 RVIVNVKEYFSMPNRAFIRDGEYHVSYN ANAYCGDNGAVLPADQTEAAHQSLQDAMKRV  
Tbg97223550 RVIVNVKEYFSMPNRAFIRDGEYHVSYN ANAYCGDNGAVLPADQTEAAHQSLQDAMKRV  
Tbg97223410 RVIVNVKEYFSMPNRAFIRDGEYHVSYN ANAYCGDNGAVLPADQTEAAHQSLQDAMKRV  
Tbg97223680 RVIVNVKEYFSMPNRAFIRDGEYHVSYN ANAYCGDNGAVLPADQTEAAHQSLQDAMKRV  
Tbg97223740 RVIVNVKEYFSMPNRAFIRDGEYHVSYN ANAYCGDNGAVLPADQTEAAHQSLQDAMKRV  
Tbg97223540 RVIVNVKEYFSMPNRAFIRDGEYHVSYN ANAYCGDNGAVLPADQTEAAHQSLQDAMKRV  
Tb92725360 RVIVNVKEYFSMPNRAFIRDGEYHVSYN ANAYCVDNGAVLPADQTEAAHQSLQSAIKRV  
Tb92725340 RVIVNVKEYFSMPNRAFIRDGEYHVSYN ANAYCVDNGAVLPADQTEAAHQILQDAMKRV  
Tb92725330 RVIVNVKEYFSMPNRAFIRDGEYHVSYN ANAYCVDNGAVLPADQTEAAHQSLQDAMKRV  
Tbg97223600 RVIVNINTIISLVNRAFIRDGEYVSYN ANAYCGDNGAVLPADQTEAAHQSLQDAMKRV  
Tbg97223520 RVIVNINTIISLVNRAFIRDGEYVSYN ANAYCGDNGAVLPADQTEAAHQSLQDAMKRV  
Tbg97223370 RVIVNINTIISMVNRAFIRDGEYVSYN ANAYCGDNGAVLPADQTEAAHQSLQDAMKRV  
Tbg97223470 RVIVNINTIISMVNRAFIRDGEYVSYN ANAYCGDNGAVLPADQTEAAHQSLQDAMKRV  
Tbg97223700 RVIVNINTIISMVNRAFIRDGEYVSYN ANAYCGDNGAVLPADQTEAAHQSLQDAMKRV  
Tbg97223620 RVIVNINTIISMVNRAFIRDGEYVSYN ANAYCGDNGAVLPADQTEAAHQSLQDAMKRV  
Tbg97223490 RVIVNINTIISMVNRAFIRDGEYVSYN ANAYCVGNGAVLPADQTEAAHQILQDAIKRV  
Tbg97223660 RVIVNINTIISMVNRAFIRDGEYVSYN ANAYCVGNGAVLPADQTEAAHQILQDAIKRV  
Tbg97223640 RVIVNINTIISMVNRAFIRDGEYVSYN ANAYCVGNGAVLPADQTEAAHQILQDAIKRV  
Tb92725350 RVIVNINTIISMVNRAFIRDGEYHVSYN ANAYCVDNGAVLPADQTEAAHQILQDAMKRV  
Tbg97223330 RVIVNVKSYFSMDNFAFAHRGN YFVSYKNAEAYCVDNGAVLPADQTEAAHQSLQSAIKRV  
Tb92725290 RVIVNVKSYFSMDNFAFAHRGN YFVSYKNAEAYCVDNGAVLPADQTEAAHQSLQSAIKRV  
Tbg97223720 RVIVNVKSYFSMVYRAFFRNKTYFVSYENA EAYCVENGAVLPADQTEAAHQSLQSAIKRV  
Tb92725320 RVIVNVKSYFSMVYRAFFRNKTYFVSYENA EAYCVENGAVLPADQTEAAHQSLQDAMKRV  
Tbg97223350 RVIVNVKEYFSMPNYAFIRRRKYMVDQESTNR YCVYFGAEVAADQTEAAHQSLQDAMKRV  
Tbg97223500 RVIVNVKEYFSMPNYAFIRRRKYMVDH ESTNR YCVYFGAEVAADQTEAAHQSLQDAMKRV  
Tb92725310 RVIVNVKTYFSVPTYAFIRKGRYAVNYEN ANAYCVFFGAVLPADQTEAAHQSLQDAMKRV  
Tbg97222800 RVIVNVKEYFSMDNFAFSRHGKYFVSYNNAEAYCRDNGAVLPADQTEAAHQSLQDAMKDV  
Tb92724760 RVIVNVKEYFSMDNFAFSRHGKYFVSYNNAEAYCRDNGAVLPADQTEAAHQSLQDAMKDV  
Tbg97222940 RVIVNVKEYFSMDNFAFSRHERYIVGYDN AEAYCVDNGAVLPADQTEAAHKSQDAIKRV

Tb92724920 RVIVNVKEYFMSDNFAFSRHERYIVGYDNAEAYCVDNGAVLPADQTEAAHQSLQDAMKSV  
TcIL30002110 KVNvnvKRRFSASNYHFNRRGERYMDYRTSRQYCDQNGVVLVADQSDASHADIDKLLKAV  
TcIL3000013740 KVNvnvKRRFSASNYHFRRGERYMDYRTSRQYCDQNGVVLVADQSDASHADIDKLLKAF  
TcIL3000027940 KVNvnvKRRFRFNSNHFNRRGERYMDYRTSRQYCDQNGVVLVADQSDASHADIEKLLKAV  
TcIL3000001110 KVNvnvKMRFDASNFFNFRRGGYMDYKTARQYCEQNGAVLVADQSDASHADIDRLKRAF  
TcIL3000033420 KVNvnvKMRFDASNFFNFRRGGYMDYKTARQYCEQNGAVLVADQSDASHADIDRILKMI  
Tb9276380 YPTAYVKEYILFPNRKFWHGDDYLVSDYNSVHICREAGGTLATDHSQATNERLTAYHLGV  
Tbg972630 YPTAYVKEYILFPNRKFWHGDDYLVSDYNSVHICREAGGTLATDHSQATNECLTAYHLSV  
Tb9276370 YPTAYVKEYILFPNRKFWHGDDYLVSDYNSVHICREAGGTLATDHSQATNERLTAYHLGV  
TcIL3000050510 -----  
TcIL3000050500 GPIASTKDYIIFPNRFRWNGGQYLVSHGATERICREEGAILATDHSQATNECLTAYHLSV  
TcIL3000016620 GPAASTKDYIIFPNARFNWNGGQYLVSHGATERICREEGAILATDHSQATDAINEVYFKL  
TcIL3000016630 GPIASTKEYIILPNRFRNEGGQYLVSHGATERICREEGAILATDHSQATDAINEVHSTL  
TcIL3000047260 GSTVSTKDYIILSDEKFQELGPNTAGHGLSKRACREEGATLATDHSQATGAAITKILKEL

Tbg97291330 NE--LGYLVLVYLGDDAKYSASSVHEEKDRCKVGDlasslncVYRWNTGLFAPATPDDNGV  
Tbg97291280 NE--LGYLVLVYLGDDAKYSASSVHEEKDRCKVGDlasslncVYRWNTGLFAPATPDDNGV  
Tbg97291270 NE--LGYLVLVYLGDDAKYSASSVHEEKDRCKVGDlasslncVYRWNTGLFAPATPDDNGV  
Tbg97291300 NE--LGYLVLVYLGDDAKYSASSVHEEKDRCKVGDlasslncVYRWNTGLFAPATPDDNGV  
Tb09v40146 NK--LGYLAYLGGDDAKYSASSVHEEKDRCKVGDlasslncVYRWNTGLFAPATPDDNGV  
Tb09v40147 NK--LGYLAYLGGDDAKYSASSVHEEKDRCKVGDlasslncVYRWNTGLFAPATPDDNGV  
Tb091601520 NE--LGYLAYLGGDDAKYSASSVHEEKDRCKVGDlasslncVYRWNTGLFAPATPDDNGV  
Tb09v40149 NK--LGYLAYLGGDDAKYSASSVHEEKDRCKVGDlasslncVYRWNTGLFAPATPDDNGV  
Tb09v40059 NK--LGYLAYLGGDDAKYSASSVHEEKDRCKVGDlasslncVYRWNTGLFAPATPDDNGV  
Tb09v40058 NK--LGYLAYLGGDDAKYSASSVHEEKDRCKVGDlasslncVYRWNTGLFAPATPDDNGV  
Tb09v40148 NK--LGYLAYLGGDDAKYSASSVHEEKDRCKVGDlasslncVYRWNTGLFAPATPDDNGV  
Tbg97291380 NE--LGYLAYLGGDDAKYSASSVHEEKDRCKVGDlasslncVYRWNTGLFAPATPDDNGV  
Tb09v40060 NK--LGYLAYLGGDDAKYSASSVHEEKDRCKVGDlasslncVYRWNTGLFAPATPDDNGV  
Tbg97291360 NE--LGYLAYLGGDDAKYSASSVHEEKDRCKVGDlasslncVYRWNTGLFAPATPDDNGV  
Tc00104705351105310 ASNKDETFRSYLGGTAETANSTP-PEQRCLRGERRASLKCIFYKWNAGAFIDSSSDGHG  
Tc00104705350763120 ASNKDETFRSYLGGTAETANSTP-PEQRCLRGERRASLKCIFYKWNAGAFIDSSSDGHG  
Tc00104705350401180 ASNKDETFRSYLGGTAETANSTP-PEQRCLRGERRASLKCIFYKWNAGAFIDSSSDGHG  
Tc001047053511859200 ASKKVETFRTYLGGTAQYADTSAP-SEQRLRGERRASLKCIFYKWNAGAFIDSSSDGHG  
Tc00104705350601110 ASKEDETFRTYLGGTAETANSTP-PEQRCLRGERRASLKCIFYKWNAGAFIDSSSDGHG  
Tc00104705351104770 ASKKVETFRSFLGGTAETADTSAP-SEQRLRGERRASLKCIFYKWNAGAFIDSSSDGHG  
Tc00104705350453350 AVHNYDTSYAYLGGADHAATPTTDPKKRRCGRGLKWATLNCIFKWNQGAFFADSSADGLGV  
Tc001047053508735100 AVHNYDTSYAYLGGADHAATPTTDPKKRRCGRGLKWATLNCIFKWNQGAFFADSSADGLGV  
Tc0010475350894510 AVRKYKTSYAYLGGADHAATSTTDLKRCGRGLKWATLNCIFKWNQGAFFADSSADGLGV  
Tc00104705350863740 VVPNYDTSYAYLGGADHAATPTTDPKKRRCGRGLKWATLNCIFKWNQGAFFADSSADGLGV  
Tc00104705351112960 AVPNYDTSYAYLGGADHAATPTTDPKKRRCGRGLKWATLNCIFKWNQGAFFADSSADGLGV  
Tc00104705351191190 AVPKYKTSYAYLGGADHAATPTTDPKKRRCGRGLKWATLNCIFKWNQGAFFADSSADGLGV  
Tc00104705351024930 AVPNYDTSYAYLGGADHAATPTTDPKKRRCGRGLKWATLNCIFKWNQGAFFADSSADGLGV  
Tc00104705350735910 K--NDRPLHSYLGDDARRASPTLEPARCKAGDEASLNCVYRWKGLFATST--HGRGA  
-----  
TvY486\_0201870 S--VKSvGYSFLGGDALSNAMRRNPLERCKAGDKTTSLNCVYRWKGLFAAAS--NGDGA  
TvY486\_0600050 AK--NNQELYSFLGGDALSNAAVRREPTKWKCKAGDKTTSLNCVYRWKGLFATAS--NGDGA  
TvY486\_0201850 IT--GSDAFSYLGDDAVYSGGVIEADKRCKPGDIASSRYCVYRWKGLFAKALPDGWSV  
Tbg97223580 IT--GSDAFSYLGDDAVYSGGVIEADKRCKPGDIASSRYCVYRWKGLFAKALPDGWSV  
Tbg97223450 IT--GSDAFSYLGDDAVYSGGVIEADKRCKPGDIASSRYCVYRWKGLFAKALPDGWSV  
Tbg97223390 IT--GSDAFSYLGDDAVYSGGVIEADKRCKPGDIASSRYCVYRWKGLFAKALPDGWSV  
Tbg97223430 IT--GSDAFSYLGDDAVYSGGVIEADKRCKPGDIASSRYCVYRWKGLFAKALPDGWSV  
Tbg97223760 IT--GSDAFSYLGDDAVYSGGVIEADKRCKPGDIASSRYCVYRWKGLFAKALPDGWSV  
Tbg97223550 IT--GSDAFSYLGDDAVYSGGVIEADKRCKPGDIASSRYCVYRWKGLFAKALPDGWSV  
Tbg97223410 IT--GSDAFSYLGDDAVYSGGVIEADKRCKPGDIASSRYCVYRWKGLFAKALPDGWSV  
Tbg97223680 IT--GSDAFSYLGDDAVYSGGVIEADKRCKPGDIASSRYCVYRWKGLFAKALPDGWSV  
Tbg97223740 IT--GSDAFSYLGDDAVYSGGVIEADKRCKPGDIASSRYCVYRWKGLFAKALPDGWSV  
Tbg97223540 IT--GSDAFSYLGDDAVYSGGVIEADKRCKPGDIASSRYCVYRWKGLFAKALPDGWSV  
Tb92725360 IA--ASDAFSYLGDDAVYSGGVIEADKRCKPGDIASSRYCVYRWKGLFAKALPDGWSV  
Tb92725340 TN--SFVAFSYLGDDAVYSGGVIEADKRCKPGDIASSRYCVYRWKGLFAKALPDGWSV  
Tb92725330 IT--GSDAFSYLGDDAVYSGGVIEADKRCKPGDIASSRYCVYRWKGLFAKALPDGWSV  
Tbg97223600 IT--GSDAFSYLGDDAVYSGGVIEADKRCKPGDIASSRYCVYRWKGLFAKALPDGWSV  
Tbg97223520 IT--GSDAFSYLGDDAVYSGGVIEADKRCKPGDIASSRYCVYRWKGLFAKALPDGWSV  
Tbg97223370 IT--GSDAFSYLGDDAVYSGGVIEADKRCKPGDIASSRYCVYRWKGLFAKALPDGWSV  
Tbg97223470 IT--GSDAFSYLGDDAVYSGGVIEADKRCKPGDIASSRYCVYRWKGLFAKALPDGWSV  
Tbg97223700 IT--GSDAFSYLGDDAVYSGGVIEADKRCKPGDIASSRYCVYRWKGLFAKALPDGWSV  
Tbg97223620 IT--GSDAFSYLGDDAVYSGGVIEADKRCKPGDIASSRYCVYRWKGLFAKALPDGWSV  
Tbg97223490 IT--GSDAFSYLGDDAVYSGGVIEADKRCKPGDIASSRYCVYRWKGLFAKALPDGWSV  
Tbg97223660 IT--GSDAFSYLGDDAVYSGGVIEADKRCKPGDIASSRYCVYRWKGLFAKALPDGWSV  
Tbg97223640 IT--GSDAFSYLGDDAVYSGGVIEADKRCKPGDIASSRYCVYRWKGLFAKALPDGWSV  
Tb92725350 TA--ASDAFSYLGDDAVYSGGVIEADKRCKPGDIASSRYCVYRWKGLFAKALPDGWSV  
Tbg97223330 IT--GSDAFSYLGDDAVYSGGVIEADKRCKPGDIASSRYCVYRWKGLFAKALPDGWSV  
Tb92725290 IT--GSDAFSYLGDDAVYSGGVIEADKRCKPGDIASSRYCVYRWKGLFAKALPDGWSV  
Tbg97223720 YS--IFVAFSYLGDDAVYSGGVIEFNKRCNAGDIASSRYCVYRWKGLFAKALPDGWSV  
Tb92725320 YS--IFVAFSYLGDDAVYSGGVIEFNKRCNAGDIASSRYCVYRWKGLFAKALPDGWSV  
Tbg97223350 IT--GSDAFSYLGDDAVYSGGVIEADKRCKPGDIASSRYCVYRWKGLFAKALPDGWSV  
Tbg97223500 IT--GSDAFSYLGDDAVYSGGVIEADKRCKPGDIASSRYCVYRWKGLFAKALPDGWSV  
Tb92725300 IT--GSDAFSYLGDDAVYSGGVIEADKRCKPGDIASSRYCVYRWKGLFAKALPDGWSV  
Tb92725310 IT--GSDAFSYLGDDAVYSGGVIEADKRCKPGDIASSRYCVYRWKGLFAKALPDGWSV



Tbg97223500 AFWHGSYVKYGAASMNGYPSFWGGEYPKRGQLYTLWSYHTGDDVTTWYDADGVSGT---  
Tb92725300 AFWHGSYVKYDGAASMNGYPSFWGSEYPKRGQLYTLWSYHTGDNSTTWYDADGVSGT---  
Tb92725310 AFWHGSYVKYDGAASMNGYPSFWGSEYPKRGQLYTLWSYHTGDNSTTWYDADGVSGT---  
Tbg97222800 AFWRGSYVKYAFAPMNGYPSFWGSEYPKHGQLYTLWSYHEDDDVTTWYDGREASGT---  
Tb92724760 AFWRGSYVKYAFAPMNGYPSFWGSEYPKHGQLYTLWSYHEDDDVTTWYDGREASGT---  
Tbg97222940 AFWRGSYVKYAFAPMNGYPSFWGSEYPKRGQLYTLWSYHEDDDVTTWYDGREASGT---  
Tb92724920 AFWRGSYVKYAFAPMNGYPSFWGSEYPKSGQLYTLWSYHEHEDVTTWYDGREASGT---  
TcIL30002110 SFWRGSFQRDPSAEAMNGYPRYWRGDYPNRGQLYVLAWRMLMNDVDTLWYDGEVSGS---  
TcIL3000013740 SFWRGSFQRDPSAEAMNGYPRYWRGDYPNRGQLYVLAWRMLMNDVDTLWYDGEVSGS---  
TcIL3000027940 SFWRGSFQRDPSAEAMNGYPRYWRGDYPNRGQLYVLAWRMLMNDVDTLWYDGEVSGS---  
TcIL3000001110 SFWRGSFQRDPSAEAMNGYPRYWRGDYPNRGQLYVLAWRMLMNDVDTLWYDGEVSGS---  
TcIL3000033420 SFWRGSFQRDPTAEAMNGYPRYWRGDYPNRGQLFVLAWRMLMNDVDTLWYDGEVSGS---  
Tb9276380 AFWRGSYTYKSGSGALGGYPSFFAQSYPDGQLHVMGWYTNVTKWFGWFD-----  
Tbg972630 AFWRGSYTYKSGSGALGGYPSFFAQSYPDGQLHVMGWYTNVTKWFGWFD-----  
Tb9276370 AFWRGSYTYKSGSGALGGYPSFFAQSYPDGQLHVMGWYTNVTKWFGWFD-----  
TcIL3000050510 -----MNDLPSRWLNTYPKYGFLYXISRRYSTESNRLWFDEPEDTHSKYA  
TcIL3000050500 AFWRGSYRSTPGAGSMNDLPSRWLNTYPKYGFLYXISRRYSTESNRLWFDEPEDTHSKYA  
TcIL3000016620 AFWRGSYRSTPGAGSMNDFPFRWIKDYPKFGFLYXISRHYRESKRTWFDDEYEDTGHEAA  
TcIL3000016630 AFWRGSYRSTPGAGSMNDFPFRWIKDYPKFGVLYPMSRRHYRESKRTWFD-----  
TcIL3000047260 AFWRGSYKRMPGAGSMNDFPFRWHPQFPGAGLLYVDSGYAKIFAGSVWFDKNE-TQOALI

\*

Tbg97291330 -----  
Tbg97291280 -----  
Tbg97291270 -----  
Tbg97291300 -----  
Tb09v40146 -----  
Tb09v40147 -----  
Tb091601520 -----  
Tb09v40149 -----  
Tb09v40059 -----  
Tb09v40058 -----  
Tb09v40148 -----  
Tbg97291380 -----  
Tb09v40060 -----  
Tbg97291360 -----  
Tc00104705351105310 -----  
Tc00104705350763120 -----  
Tc00104705350401180 -----  
Tc001047053511859200 -----  
Tc00104705350601110 -----  
Tc00104705351104770 -----  
Tc00104705350453350 -----  
Tc001047053508735100 -----  
Tc0010475350894510 -----  
Tc00104705350863740 -----  
Tc00104705351112960 -----  
Tc00104705351191190 -----  
Tc00104705351024930 -----  
Tc00104705350735910 -----  
TvY486\_0201870 -----  
TvY486\_0600050 -----  
TvY486\_0028480 -----  
TvY486\_0201850 -----  
Tbg97223580 -----  
Tbg97223450 -----  
Tbg97223390 -----  
Tbg97223430 -----  
Tbg97223760 -----  
Tbg97223550 -----  
Tbg97223410 -----  
Tbg97223680 -----  
Tbg97223740 -----  
Tbg97223540 -----  
Tb92725360 -----  
Tb92725340 -----  
Tb92725330 -----  
Tbg97223600 -----  
Tbg97223520 -----  
Tbg97223370 -----  
Tbg97223470 -----  
Tbg97223700 -----  
Tbg97223620 -----  
Tbg97223490 -----  
Tbg97223660 -----  
Tbg97223640 -----  
Tb92725350 -----  
Tbg97223330 -----  
Tb92725290 -----



Tbg97223720 -----  
Tb92725320 -----  
Tbg97223350 -----  
Tbg97223500 -----  
Tb92725300 -----  
Tb92725310 -----  
Tbg97222800 -----  
Tb92724760 -----  
Tbg97222940 -----  
Tb92724920 -----  
TcIL30002110 -----  
TcIL3000013740 -----  
TcIL3000027940 -----  
TcIL3000001110 -----  
TcIL3000033420 -----  
Tb9276380 -----  
Tbg972630 -----  
Tb9276370 -----  
TcIL3000050510 YTVRAERPVGIFYVALCNIVVFTTSAPVPOPEST-----  
TcIL3000050500 YTVRAERPVGIFYVALCNIVVFTTSAPVPOPEST-----  
TcIL3000016620 HVVRKEKQVKNFVLLCNIVVPTTSAPVPOPESE-----  
TcIL3000016630 -----  
TcIL3000047260 YEVFRFRTHLILCQLQNKKPAPLPPSPGPATADNEELNGTDANETASEELNGTDANETA-----

Tbg97291330 -----  
Tbg97291280 -----  
Tbg97291270 -----  
Tbg97291300 -----  
Tb09v40146 -----  
Tb09v40147 -----  
Tb091601520 -----  
Tb09v40149 -----  
Tb09v40059 -----  
Tb09v40058 -----  
Tb09v40148 -----  
Tbg97291380 -----  
Tb09v40060 -----  
Tbg97291360 -----  
Tc00104705351105310 -----  
Tc00104705350763120 -----  
Tc00104705350401180 -----  
Tc001047053511859200 -----  
Tc00104705350601110 -----  
Tc00104705351104770 -----  
Tc00104705350453350 -----  
Tc001047053508735100 -----  
Tc0010475350894510 -----  
Tc00104705350863740 -----  
Tc00104705351112960 -----  
Tc00104705351191190 -----  
Tc00104705351024930 -----  
Tc00104705350735910 -----  
TvY486\_0201870 -----  
TvY486\_0600050 -----  
TvY486\_0028480 -----  
TvY486\_0201850 -----  
Tbg97223580 -----  
Tbg97223450 -----  
Tbg97223390 -----  
Tbg97223430 -----  
Tbg97223760 -----  
Tbg97223550 -----  
Tbg97223410 -----  
Tbg97223680 -----  
Tbg97223740 -----  
Tbg97223540 -----  
Tb92725360 -----  
Tb92725340 -----  
Tb92725330 -----  
Tbg97223600 -----  
Tbg97223520 -----  
Tbg97223370 -----  
Tbg97223470 -----  
Tbg97223700 -----  
Tbg97223620 -----  
Tbg97223490 -----  
Tbg97223660 -----  
Tbg97223640 -----

Tb92725350 -----  
Tbg97223330 -----  
Tb92725290 -----  
Tbg97223720 -----  
Tb92725320 -----  
Tbg97223350 -----  
Tbg97223500 -----  
Tb92725300 -----  
Tb92725310 -----  
Tbg97222800 -----  
Tb92724760 -----  
Tbg97222940 -----  
Tb92724920 -----  
TcIL30002110 -----  
TcIL3000013740 -----  
TcIL3000027940 -----  
TcIL3000001110 -----  
TcIL3000033420 -----  
Tb9276380 -----  
Tbg972630 -----  
Tb9276370 -----  
TcIL3000050510 -----ETESEEHNGTNTNETESEELNGTNANETASEELNGTNVNETAGEELNGTN  
TcIL3000050500 -----ETESEEHNGTNTNETASEELNGTNANETASEELNGTNVNETAGEELNGTN  
TcIL3000016620 -----  
TcIL3000016630 -----  
TcIL3000047260 -----SEELNGTDANETASEELNGTNANETASEELNGTDANETASEELNGTNANETASEELNGTD

Tbg97291330 -----NISFTNTRARSTRFFMVLCE  
Tbg97291280 -----NISFTNTRARSTRFFMVLCE  
Tbg97291270 -----NISFTNTRARSTRFFMVLCE  
Tbg97291300 -----NISFTNTRARSTRFFMVLCE  
Tb09v40146 -----NISFTNTRARSTRFFMVLCE  
Tb09v40147 -----NISFTNTRARSTRFFMVLCE  
Tb091601520 -----ISMFTNTRGRSTRFFMVLCE  
Tb09v40149 -----ISMFTNTRGRSTRFFMVLCE  
Tb09v40059 -----ISMFTNTRGRSTRFFMVLCE  
Tb09v40058 -----ISMFTNTRGRSTRFFMVLCE  
Tb09v40148 -----ISMFTNTRGRSTRFFMVLCE  
Tbg97291380 -----ISPFTNVRGRSIYYFKVLCE  
Tb09v40060 -----NINLMNVRSAVSRDIYILCE  
Tbg97291360 -----NINLMNVRSAVGRGICILCE  
Tc00104705351105310 -----QLFLMFRMDTNQ  
Tc00104705350763120 -----QLFLMFRMDTNQ  
Tc00104705350401180 -----QLFLMFRMDTNQ  
Tc001047053511859200 -----QLFLMLRMDTSQ  
Tc00104705350601110 -----QLFLMLRMDTSQ  
Tc00104705351104770 -----QLFLMFRMDTSQ  
Tc00104705350453350 -----KTFMLRLKKE  
Tc001047053508735100 -----KTFMLRLKKTRE  
Tc0010475350894510 -----KTFMLRLKMTD  
Tc00104705350863740 -----KTFMLRLKNTTD  
Tc00104705351112960 -----KTFMLRLKTTD  
Tc00104705351191190 -----KTFMLRLKTTD  
Tc00104705351024930 -----KTFMLRLKTTD  
Tc00104705350735910 -----KTFMLRLKTTD  
TvY486\_0201870 -----SSAKVPIEKTLLSNYIACVE  
TvY486\_0600050 -----SSAKVPIEKTLLSNYIACVE  
TvY486\_0028480 -----YFAPTPILYTYVTNYIACVE  
TvY486\_0201850 -----HYAQAPIQGTYYVTSYIACVE  
Tbg97223580 -----IKWASDNPDTKTENYVILCE  
Tbg97223450 -----IKWASDNPDTKTENYVILCE  
Tbg97223390 -----IKWASDNPDTKTENYVILCE  
Tbg97223430 -----IKWASDNPDTKTENYVILCE  
Tbg97223760 -----IKWASDNPDTKTENYVILCE  
Tbg97223550 -----IKWASDNPDTKTENYVILCE  
Tbg97223410 -----IKWASDNPDTKTENYVILCE  
Tbg97223680 -----IKWASDNPDTKTENYVILCE  
Tbg97223740 -----IKWASDNPDTKTENYVILCE  
Tbg97223540 -----IKWASDNPDTKTENYVILCE  
Tb92725360 -----IKWASDNPDTKTENYVILCE  
Tb92725340 -----IKGTSKNPATKTENYVILCE  
Tb92725330 -----IKWTSKNPATKTENYVILCE  
Tbg97223600 -----IKGTSKNPATKTENYVILCE  
Tbg97223520 -----IKGTSKNPATKTENYVILCE  
Tbg97223370 -----IKGTSKNPATKTENYVILCE  
Tbg97223470 -----IKGTSKNPATKTENYVILCE  
Tbg97223700 -----IKGTSKNPATKTENYVILCE  
Tbg97223620 -----IKWTSKNPATKTENYVILCE

Tbg97223490 -----IKGTSKNPATKTENYVILCE  
Tbg97223660 -----IKGTSKNPATKTENYVILCE  
Tbg97223640 -----IKGTSKNPATKTENYVILCE  
Tb92725350 -----IKGTSKNPATKTENYVILCE  
Tbg97223330 -----IKWASDNPDTKTENYVILCE  
Tb92725290 -----IKWASDNPDTKTENYVILCE  
Tbg97223720 -----LVAASNNPETTNKNYVILCE  
Tb92725320 -----LVAASNNPETTNKNYVILCE  
Tbg97223350 -----IRWTSRNFDTKSQDYVIVCE  
Tbg97223500 -----IRWTSRNFDTKSQDYVIVCE  
Tb92725300 -----IRWTSRNFDTKSQDYVIVCE  
Tb92725310 -----IRWTSRNFDTKSQDYVIVTCE  
Tbg97222800 -----IRWTSQNFETKSQDYVVVCE  
Tb92724760 -----IRWTSQNFETKSQDYVVVCE  
Tbg97222940 -----IRWTSQNFETKSQDYVVVCE  
Tb92724920 -----IRWTSQNFETKSQDYVVVCE  
TcIL30002110 -----NRRSSRNPGTKSEEYRILCE  
TcIL3000013740 -----DRRSSRNPGTKSEEYRILCE  
TcIL3000027940 -----DRKSSRNPGTKSEEYHILCE  
TcIL3000001110 -----DRKTSRNPGTKSGEYHILCE  
TcIL3000033420 -----DRKTSRNPGTKSDEYRMLCE  
Tb9276380 -----GGEVSGNKPGGKAPGY  
Tbg972630 -----GGEVSGNKPGGKAPGY  
Tb9276370 -----GGEVSGNKPGGKAPGY  
TcIL3000050510 ASETAGEELNGTNTNETASEELNGTNTNETASEGLNGTNANETASEELNGTNTNETASEE  
TcIL3000050500 ASETAGEELNGTSANETASEELNGTNANETASEELNGTNANETASEELNGTNANETASEE  
TcIL3000016620 -----D-----ENASEELNGTNANETESEELNGTNTNETESEED  
TcIL3000016630 -----VTLETAGSSTEGSVLDE  
TcIL3000047260 ANETASEELNGTDANETASEELNGTNANETASEELNGTDANETASEELNGTDTNETASEE

Tbg97291330 ASAVPTPLPP-----ASPHSENT  
Tbg97291280 ASAVPTPLPP-----ASPHSENT  
Tbg97291270 ASAVPTPLPP-----ASPHSENT  
Tbg97291300 ASAVPTPLPP-----ASPHSENT  
Tb09v40146 ASAVPTPLPP-----ASPHSENT  
Tb09v40147 ASAVPTPLPP-----ASPHSENT  
Tb091601520 ASAVPTPLPP-----ASPHSENT  
Tb09v40149 ASAVPTPLPP-----ASPHSENT  
Tb09v40059 ASAVPTPLPP-----ASPHSENT  
Tb09v40058 ASAVPTPLPP-----ASPHSENT  
Tb09v40148 ASAVPTPLPP-----ASPHSENT  
Tbg97291380 ASAVPTPLPP-----ASPHSENT  
Tb09v40060 ASAVPTPLPP-----ASPHSENT  
Tbg97291360 TSLIVAVAAENLIDADTFVNERKQSVNDKQSSGNTSAVGNITVREGKRPDGNSEDKNT  
Tc00104705351105310 TSLTVALAAENLFATDTFAVNERKQSVNDKQCSGNTSAVGNISVREGKKGENTSDDKNT  
Tc00104705350763120 NDEKATWYDG-----Q  
Tc00104705350401180 NDEKATWYDG-----Q  
Tc001047053511859200 SDEKATWYDG-----Q  
Tc00104705350601110 SDKKATWYDG-----Q  
Tc00104705351104770 SDKNATWYDG-----Q  
Tc00104705350453350 SYEKATWYDG-----Q  
Tc001047053508735100 NSGNATWYDW-----Y  
Tc0010475350894510 NSEQATWYDW-----Y  
Tc00104705350863740 NSEKATWYDW-----Y  
Tc0010470535112960 NSEKATWYDW-----Y  
Tc00104705351191190 NNGNATWYDW-----Y  
Tc00104705351024930 NNEQATWYDW-----Y  
Tc00104705350735910 NNGNATWYDW-----Y  
TvY486\_0201870 NSGNATWYDW-----Y  
TvY486\_0600050 VQDSISTSTT-----T  
TvY486\_0028480 VQDSISTSTT-----T  
TvY486\_0201850 VQDSVSTTGT-----G  
Tbg97223580 SQDSISSSTT-----T  
Tbg97223450 VHDSIS---T-----T  
Tbg97223390 VHDSIS---T-----T  
Tbg97223430 VHDSIS---T-----T  
Tbg97223760 VHDSIS---T-----T  
Tbg97223550 VHDSIS---T-----T  
Tbg97223410 VHDSIS---T-----T  
Tbg97223680 VHDSIS---T-----T  
Tbg97223740 VHDSIS---T-----T  
Tbg97223540 VHDSIS---T-----T  
Tb92725360 VHDSISTT-T-----T  
Tb92725340 VHDSISTT-T-----T  
Tb92725330 VHDSISTT-T-----T  
Tbg97223600 VHDSIS-----  
Tbg97223520 VHDSIS-----  
Tbg97223370 VHDSIS-----

|                |                  |
|----------------|------------------|
| Tbg97223470    | VHDSIS-----      |
| Tbg97223700    | VHDSIS-----      |
| Tbg97223620    | VHDSIS-----      |
| Tbg97223490    | VHDSIS-----      |
| Tbg97223660    | VHDSIS-----      |
| Tbg97223640    | VHDSIS-----      |
| Tb92725350     | VHDSISTT-T-----T |
| Tbg97223330    | VHDSISTT-T-----T |
| Tb92725290     | VHDSISTT-T-----T |
| Tbg97223720    | VHDSIST-----     |
| Tb92725320     | VHDSIS-----      |
| Tbg97223350    | VQRYVTVA-A-----D |
| Tbg97223500    | VQRYVTVA-A-----D |
| Tb92725300     | VQRYVTVA-A-----D |
| Tb92725310     | VQTDIITT-T-----T |
| Tbg97222800    | VHDSIS-----      |
| Tb92724760     | VHDSIST-----     |
| Tbg97222940    | VHDSIST-----     |
| Tb92724920     | VHDSIS-----      |
| TcIL30002110   | VHOSIAKPTT-----T |
| TcIL3000013740 | VHOSIAKPTT-----T |
| TcIL3000027940 | VHOSIAKPTT-----T |
| TcIL3000001110 | VHOSIAKS-----    |
| TcIL3000033420 | VHRSIAKP-----    |
| Tb9276380      | KSLTYFAALC-----E |
| Tbg972630      | KSLTYFAALC-----E |
| Tb9276370      | KSLTYFAALC-----E |
| TcIL3000050510 | LNGTNTNETA-----S |
| TcIL3000050500 | LNGTANETA-----S  |
| TcIL3000016620 | LNGTNTNETA-----S |
| TcIL3000016630 | RNSTLT-----      |
| TcIL3000047260 | LNGDTNETA-----S  |

|                      |                                                              |
|----------------------|--------------------------------------------------------------|
| Tbg97291330          | TADEN-----TTVDGNTNADG-----                                   |
| Tbg97291280          | TADEN-----TTVDGNTNAD-----                                    |
| Tbg97291270          | TADEN-----TTADGNTNAD-----                                    |
| Tbg97291300          | TADEN-----TTADENTTADG-----                                   |
| Tb09v40146           | TADEN-----TTADENTTVDE-----                                   |
| Tb09v40147           | TADEN-----TTVDENTTVDE-----                                   |
| Tb091601520          | TADEN-----TTVDENTTVDE-----                                   |
| Tb09v40149           | TADEN-----TTADENTTAD-----                                    |
| Tb09v40059           | TVDEN-----TTADENTTVDE-----                                   |
| Tb09v40058           | TVDEN-----TTADENTTVDE-----                                   |
| Tb09v40148           | TADEN-----TTADGNTTVDE-----                                   |
| Tbg97291380          | TADEN-----TTADGNTTADGNTTADGNTNADGNTTADGNTTADGNTNADGN         |
| Tb09v40060           | TSHENRSYDD-SSVADGNTSEDKNTTSHENSSHDDSSVADGNTSEDKNTTSHENSSHDDS |
| Tbg97291360          | TSHENRSYND-SSVADGNTSDDESTTSHENRSYDSSVADGNTSDDESTTSHENRSYDSS  |
| Tc00104705351105310  | G-----VPKYDKE-----                                           |
| Tc00104705350763120  | G-----VPRGDGE-----                                           |
| Tc00104705350401180  | G-----VPKYDKE-----                                           |
| Tc001047053511859200 | G-----VPRYDGE-----                                           |
| Tc00104705350601110  | G-----VPRYDGE-----                                           |
| Tc00104705351104770  | G-----VPWYDGE-----                                           |
| Tc00104705350453350  | P-----APKDHD-----                                            |
| Tc001047053508735100 | P-----APKTHID-----                                           |
| Tc0010475350894510   | P-----APKTHID-----                                           |
| Tc00104705350863740  | P-----APKDHD-----                                            |
| Tc00104705351112960  | P-----APKDHTD-----                                           |
| Tc00104705351191190  | P-----APKDHTD-----                                           |
| Tc00104705351024930  | P-----APKDHTD-----                                           |
| Tc00104705350735910  | P-----APKDHTD-----                                           |
| TvY486_0201870       | T-----TTTTTTTTTTTTTTTTST-----                                |
| TvY486_0600050       | T-----TTTTTTTTTTTTTTTT-----                                  |
| TvY486_0028480       | NGE---SASLASGAKLPFTSTNDAG-----                               |
| TvY486_0201850       | TRAPTTTTTTTTTEAPRTTTTTST-----                                |
| Tbg97223580          | T-----TTTTTTTTTTTT-----                                      |
| Tbg97223450          | T-----TTTTTTTTTTTT-----                                      |
| Tbg97223390          | T-----TTTTTTTTTTTT-----                                      |
| Tbg97223430          | T-----TTTTTTTTTTTT-----                                      |
| Tbg97223760          | T-----TTTTTTTTTTTT-----                                      |
| Tbg97223550          | T-----TTTTTTTTTTTT-----                                      |
| Tbg97223410          | T-----TTTTTTTTTTTT-----                                      |
| Tbg97223680          | T-----TTTTTTTTTTTT-----                                      |
| Tbg97223740          | T-----TTTTTTTTTTTT-----                                      |
| Tbg97223540          | T-----TTTTTTTTTTTT-----                                      |
| Tb92725360           | T-----TTTTTTTTTTTT-----                                      |
| Tb92725340           | T-----TTTTTTTTTTTT-----                                      |
| Tb92725330           | T-----TTTTTTTTTTTT-----                                      |

Tbg97223600 -----TTTTTTTTTT-----  
Tbg97223520 -----TTTTTTTTTT-----  
Tbg97223370 -----TTTTTTTTTT-----  
Tbg97223470 -----TTTTTTTTTT-----  
Tbg97223700 -----TTTTTTTTTT-----  
Tbg97223620 -----TTTTTTTTTT-----  
Tbg97223490 -----TTTTTTTTTT-----  
Tbg97223660 -----TTTTTTTTTT-----  
Tbg97223640 -----TTTTTTTTTT-----  
Tb92725350 T-----TTTTTTTTTT-----  
Tbg97223330 T-----TTTTTTTTTT-----  
Tb92725290 T-----TTTTTTTTTT-----  
Tbg97223720 -----TTTTTTTTTT-----  
Tb92725320 -----TTTTTTTTTT-----  
Tbg97223350 N-----YTTTTTTTTTTTT-----  
Tbg97223500 N-----YTTTTTTTTTTTT-----  
Tb92725300 N-----YTTTTTTT-----  
Tb92725310 -----TTTTTT-----  
Tbg97222800 -----TTTTTTTTTT-----  
Tb92724760 -----TTTTTTTTTT-----  
Tbg97222940 -----TTTTTTTTTT-----  
Tb92724920 -----TTTTTT-----  
TcIL30002110 T-----TTTTTTTTTT-----  
TcIL3000013740 T-----TTTTTTTTTT-----  
TcIL3000027940 T-----TTTTTTTTTT-----  
TcIL3000001110 -----TTTTTTTTTT-----  
TcIL3000033420 -----TTTTTTTTTT-----  
Tb9276380 VT-----VPQPSHPVPGNGNS-----  
Tbg972630 VT-----VPQPSNPVPGNGNSP-----  
Tb9276370 VT-----VPQPSHPVPGNGNS-----  
TcIL3000050510 EE-----LNGTNANETASEELNGTNETASEGLNGTNANETASEELNGTNA-----  
TcIL3000050500 EE-----LNGTNANETASEELNGTNANETASEELNGTNETASEELNGTNA-----  
TcIL3000016620 EE-----LNGTNETASEELN-----GTNANETASEELNGTNA-----  
TcIL3000016630 G-----IVGHIQHETPVAPPS-----P-----  
TcIL3000047260 EE-----LNGTDTNETASEELNGTDTNETASEELNGTNANETASEELNGTDANETAS

Tbg97291330 -----  
Tbg97291280 -----  
Tbg97291270 -----  
Tbg97291300 -----  
Tb09v40146 -----  
Tb09v40147 -----  
Tb091601520 -----  
Tb09v40149 -----  
Tb09v40059 -----  
Tb09v40058 -----  
Tb09v40148 -----  
Tbg97291380 TTADG-----  
Tb09v40060 SVADG-----  
Tbg97291360 SVADGNSSDDESTSDDESTSDYESTAGENTNADGNTSNEKNTTTHEYRSYDDSSVADGNT  
Tc00104705351105310 -----  
Tc00104705350763120 -----  
Tc00104705350401180 -----  
Tc001047053511859200 -----  
Tc00104705350601110 -----  
Tc00104705351104770 -----  
Tc00104705350453350 -----  
Tc001047053508735100 -----  
Tc0010475350894510 -----  
Tc00104705350863740 -----  
Tc00104705351112960 -----  
Tc00104705351191190 -----  
Tc00104705351024930 -----  
Tc00104705350735910 -----  
TvY486\_0201870 -----  
TvY486\_0600050 -----  
TvY486\_0028480 -----  
TvY486\_0201850 -----  
Tbg97223580 -----  
Tbg97223450 -----  
Tbg97223390 -----  
Tbg97223430 -----  
Tbg97223760 -----  
Tbg97223550 -----  
Tbg97223410 -----  
Tbg97223680 -----  
Tbg97223740 -----  
Tbg97223540 -----



Tbg97223680  
Tbg97223740  
Tbg97223540  
Tb92725360  
Tb92725340  
Tb92725330  
Tbg97223600  
Tbg97223520  
Tbg97223370  
Tbg97223470  
Tbg97223700  
Tbg97223620  
Tbg97223490  
Tbg97223660  
Tbg97223640  
Tb92725350  
Tbg97223330  
Tb92725290  
Tbg97223720  
Tb92725320  
Tbg97223350  
Tbg97223500  
Tb92725300  
Tb92725310  
Tbg97222800  
Tb92724760  
Tbg97222940  
Tb92724920  
TcIL30002110  
TcIL3000013740  
TcIL3000027940  
TcIL3000001110  
TcIL3000033420  
Tb9276380  
Tbg972630  
Tb9276370  
TcIL3000050510  
TcIL3000050500  
TcIL3000016620  
TcIL3000016630  
TcIL3000047260

Tbg97291330  
Tbg97291280  
Tbg97291270  
Tbg97291300  
Tb09v40146  
Tb09v40147  
Tb091601520  
Tb09v40149  
Tb09v40059  
Tb09v40058  
Tb09v40148  
Tbg97291380  
Tb09v40060  
Tbg97291360  
Tc00104705351105310  
Tc00104705350763120  
Tc00104705350401180  
Tc001047053511859200  
Tc00104705350601110  
Tc00104705351104770  
Tc00104705350453350  
Tc001047053508735100  
Tc0010475350894510  
Tc00104705350863740  
Tc00104705351112960  
Tc00104705351191190  
Tc00104705351024930  
Tc00104705350735910  
TvY486\_0201870  
TvY486\_0600050  
TvY486\_0028480  
TvY486\_0201850  
Tbg97223580  
Tbg97223450  
Tbg97223390  
Tbg97223430

SYDDSSVADGNTSDEESTTSHENRSYDDSSVAMGTQVTMKVLPMMRVLVTMSTAGENTKA

Tbg97223760 -----  
Tbg97223550 -----  
Tbg97223410 -----  
Tbg97223680 -----  
Tbg97223740 -----  
Tbg97223540 -----  
Tb92725360 -----  
Tb92725340 -----  
Tb92725330 -----  
Tbg97223600 -----  
Tbg97223520 -----  
Tbg97223370 -----  
Tbg97223470 -----  
Tbg97223700 -----  
Tbg97223620 -----  
Tbg97223490 -----  
Tbg97223660 -----  
Tbg97223640 -----  
Tb92725350 -----  
Tbg97223330 -----  
Tb92725290 -----  
Tbg97223720 -----  
Tb92725320 -----  
Tbg97223350 -----  
Tbg97223500 -----  
Tb92725300 -----  
Tb92725310 -----  
Tbg97222800 -----  
Tb92724760 -----  
Tbg97222940 -----  
Tb92724920 -----  
TcIL30002110 -----  
TcIL3000013740 -----  
TcIL3000027940 -----  
TcIL3000001110 -----  
TcIL3000033420 -----  
Tb9276380 -----  
Tbg972630 -----  
Tb9276370 -----  
TcIL3000050510 -----  
TcIL3000050500 -----  
TcIL3000016620 -----  
TcIL3000016630 -----  
TcIL3000047260 -----

Tbg97291330 -----NTNADENTTA  
Tbg97291280 -----  
Tbg97291270 -----N-----TTA  
Tbg97291300 -----N-----TNA  
Tb09v40146 -----NTTADENTTA  
Tb09v40147 -----NTTADENTTA  
Tb091601520 -----NTTADENTTV  
Tb09v40149 -----N-----  
Tb09v40059 -----N-----  
Tb09v40058 -----N-----  
Tb09v40148 -----NTTADENTTV  
Tbg97291380 N-----ITTDGNTNADGNTTA  
Tb09v40060 --NTSEDKNTTSHENRSYDDSSVADGNTSEDKNTTSHENRSYDDSSVADGNTSDDKNTTS  
Tbg97291360 DGNTSDESTTSHENRSYDDSSVADGNTSDDKSTTSHENRSYDDSSVADGNTSDDKNTTS  
Tc00104705351105310 -----  
Tc00104705350763120 -----  
Tc00104705350401180 -----  
Tc001047053511859200 -----  
Tc00104705350601110 -----  
Tc00104705351104770 -----  
Tc00104705350453350 -----  
Tc001047053508735100 -----  
Tc0010475350894510 -----  
Tc00104705350863740 -----  
Tc00104705351112960 -----  
Tc00104705351191190 -----  
Tc00104705351024930 -----  
Tc00104705350735910 -----  
TvY486\_0201870 -----  
TvY486\_0600050 -----  
TvY486\_0028480 -----  
TvY486\_0201850 -----  
Tbg97223580 -----



Tbg97223450 -----  
Tbg97223390 -----  
Tbg97223430 -----  
Tbg97223760 -----  
Tbg97223550 -----  
Tbg97223410 -----  
Tbg97223680 -----  
Tbg97223740 -----  
Tbg97223540 -----  
Tb92725360 -----  
Tb92725340 -----  
Tb92725330 -----  
Tbg97223600 -----  
Tbg97223520 -----  
Tbg97223370 -----  
Tbg97223470 -----  
Tbg97223700 -----  
Tbg97223620 -----  
Tbg97223490 -----  
Tbg97223660 -----  
Tbg97223640 -----  
Tb92725350 -----  
Tbg97223330 -----  
Tb92725290 -----  
Tbg97223720 -----  
Tb92725320 -----  
Tbg97223350 -----  
Tbg97223500 -----  
Tb92725300 -----  
Tb92725310 -----  
Tbg97222800 -----  
Tb92724760 -----  
Tbg97222940 -----  
Tb92724920 -----  
TcIL30002110 -----  
TcIL3000013740 -----  
TcIL3000027940 -----  
TcIL3000001110 -----  
TcIL3000033420 -----  
Tb9276380 -----  
Tbg972630 -----AN  
Tb9276370 -----  
TcIL3000050510 -----NETAS  
TcIL3000050500 -----NETAS  
TcIL3000016620 -----NETES  
TcIL3000016630 -----  
TcIL3000047260 -----NGDTONETAS

Tbg97291330 DENTTADENTTADGNTNADENTTADEN-----  
Tbg97291280 -EN-----TTADGNTNADEN-----  
Tbg97291270 DENTTADENTTADGNTTADENTTVDEN-----  
Tbg97291300 DENTTADGNTTADGNTNADENTTVDEN-----  
Tb09v40146 DENTTADENTTADENTTADENTTVDEN-----  
Tb09v40147 DENTTVDENTTADENTTADENTTADEN-----  
Tb091601520 DENATVDENTTVDENTTADENTTADEN-----  
Tb09v40149 -----TTVDGNTNADENTTADEN-----  
Tb09v40059 -----TTVDENTNADENTTADEN-----  
Tb09v40058 -----ATVDENTTADENTTVDEN-----  
Tb09v40148 DENTTVDENTTADGNTNADENTTADEN-----  
Tbg97291380 DGNTTADGNTTADGNTNADGNTTTDEN-----  
Tb09v40060 HENRSYDDSSVADGNTSDDKNTTSHENRSYDDSSVADGNTSEDKNTTSHENRSYDDSSVA  
Tbg97291360 HENRSCDDSSVADGNTSDDKNTTSHENRSYDDSSVADGNTSDDKNTTSHENRSYDDSSVA  
Tc00104705351105310 -----TPEKTFG-----  
Tc00104705350763120 -----TPENTFG-----  
Tc00104705350401180 -----TPEKTFG-----  
Tc001047053511859200 -----TPEDTFG-----  
Tc00104705350601110 -----TPEDTFG-----  
Tc00104705351104770 -----TPENTFG-----  
Tc00104705350453350 -----TPYRSFG-----  
Tc001047053508735100 -----TPYRSFG-----  
Tc0010475350894510 -----TPYRSFG-----  
Tc00104705350863740 -----TPYLSFG-----  
Tc00104705351112960 -----TPYRSFG-----  
Tc00104705351191190 -----TPYRSFG-----  
Tc00104705351024930 -----TPYRSFG-----  
Tc00104705350735910 -----TPYRSFG-----  
TvY486\_0201870 --TTTTKPTTPTPTTT--TTTTTKP-----  
TvY486\_0600050 -----TKPPTTPTPTTT--TTTTTKP-----

TvY486\_0028480 --GNILIPNSSPSSSTNNAPVSSLTAMPTVDEASLAASGGGNSGTNGA-----  
TvY486\_0201850 --TSTTTTTTKAPTSTTT---STTATVAPTNTTSSSSTTESPSSPTTMADG-----  
Tbg97223580 -----TTAAPASGVVPEP-----  
Tbg97223450 -----TTAAPASGVVPEP-----  
Tbg97223390 -----TTAAPASGVVPEP-----  
Tbg97223430 -----TTAAPASGVVPEP-----  
Tbg97223760 -----TTAAPASGVVPEP-----  
Tbg97223550 -----TTAAPASGVVPEP-----  
Tbg97223410 -----TTAAPASGVVPEP-----  
Tbg97223680 -----TTAAPASGVVPEP-----  
Tbg97223740 -----TTAAPASGVVPEP-----  
Tbg97223540 -----TTAAPASGVVPEP-----  
Tb92725360 -----TTAAPASGEVPEP-----  
Tb92725340 -----TTAAPASGEVPEP-----  
Tb92725330 -----TTAAPASGEVPEP-----  
Tbg97223600 -----TTAAPASGEVPEP-----  
Tbg97223520 -----TTAAPASGEVPEP-----  
Tbg97223370 -----TTAAPASGEVPEP-----  
Tbg97223470 -----TTAAPASGEVPEP-----  
Tbg97223700 -----TTAAPASGEVPEP-----  
Tbg97223620 -----TTAAPASGEVPEP-----  
Tbg97223490 -----TTAAPASGEVPEP-----  
Tbg97223660 -----TTAAPASGEVPEP-----  
Tbg97223640 -----TTAAPASGEVPEP-----  
Tb92725350 -----TTAAPASGEVPEP-----  
Tbg97223330 -----TTAAPASGVVPEP-----  
Tb92725290 -----TTAAPASGEVPEP-----  
Tbg97223720 -----TTAAPASGEVPEP-----  
Tb92725320 -----TTAAPASGEVPEP-----  
Tbg97223350 -----TTAAPASGEVPEP-----  
Tbg97223500 -----TTAAPASGEVPEP-----  
Tb92725300 -----TTAAPASGEVPEP-----  
Tb92725310 -----TTAAPASGEVPEP-----  
Tbg97222800 -----AAPASGEVPEP-----  
Tb92724760 -----TAPASGEVPEP-----  
Tbg97222940 -----AAPASGEVPEP-----  
Tb92724920 -----AAPASGEVPEP-----  
TcIL30002110 -----TTTTTTTTKKPENTTTSTTT-----  
TcIL3000013740 -----TTTTTTTTKKPENTTTSTTT-----  
TcIL3000027940 -----TTTTTTTTKKPENTTTSTTT-----  
TcIL3000001110 -----TPTTTTTTKQPEN-----  
TcIL3000033420 -----TTTTTTTTKQPEN-----  
Tb9276380 -----TANEELAVINESLHSDEE-----  
Tbg972630 EDEVSGNGNSTANEELAVINESLHSDEE-----  
Tb9276370 -----TANEELAVINESLHSDEE-----  
TcIL3000050510 EELNGTNTNETASEELNGTNANETG-----  
TcIL3000050500 EELNGTNANETASEELNGTNANETASEELNGTNANETESEELNGTSANETESEELN-----  
TcIL3000016620 EELNGTSANETASEELNGTNVNETE-----  
TcIL3000016630 --LSGPEGSETASEELNGTNVNETE-----  
TcIL3000047260 EELNGTDANETASEELNGTNANETASEELNGTDANETASEELNGTDANETASEELNGTDA

Tbg97291330 -----TTADENTTVDGD-----TNAD-----  
Tbg97291280 -----  
Tbg97291270 -----  
Tbg97291300 -----TTVDEN-----  
Tb09v40146 -----TTVDENTTVDENTTADGNTNADENTTAD-----  
Tb09v40147 -----TTVDENTTADEN-----TTVD-----  
Tb091601520 -----TTADEN-----  
Tb09v40149 -----TTADEN-----  
Tb09v40059 -----TTVDENTNADEN-----TTAD-----  
Tb09v40058 -----TTVDEN-----  
Tb09v40148 -----TTVDEN-----TTVD-----  
Tbg97291380 -----TTADENTNADGNTTDTGNTNADGNTTADGNI TDTGNTNADGNTTADGNTTA  
Tb09v40060 DGNTSDDKNTTSHENSSHDDSSVADGNTSEDKNTTSHENRSHDDSSVADGNTSEDKNTTS  
Tbg97291360 DGNSSDDKNTTSHENRSYDDSSVADGNSDDKNTTSHENRSYDDSSVADGNTSDDKNTTT  
Tc00104705351105310 -----  
Tc00104705350763120 -----  
Tc00104705350401180 -----  
Tc001047053511859200 -----  
Tc00104705350601110 -----  
Tc00104705351104770 -----  
Tc00104705350453350 -----  
Tc001047053508735100 -----  
Tc0010475350894510 -----  
Tc00104705350863740 -----  
Tc00104705351112960 -----  
Tc00104705351191190 -----  
Tc00104705351024930 -----



Tc0010470535112960 -----  
Tc00104705351191190 -----  
Tc00104705351024930 -----  
Tc00104705350735910 -----  
TvY486\_0201870 -----  
TvY486\_0600050 -----  
TvY486\_0028480 -----  
TvY486\_0201850 -----  
Tbg97223580 -----  
Tbg97223450 -----  
Tbg97223390 -----  
Tbg97223430 -----  
Tbg97223760 -----  
Tbg97223550 -----  
Tbg97223410 -----  
Tbg97223680 -----  
Tbg97223740 -----  
Tbg97223540 -----  
Tb92725360 -----  
Tb92725340 -----  
Tb92725330 -----  
Tbg97223600 -----  
Tbg97223520 -----  
Tbg97223370 -----  
Tbg97223470 -----  
Tbg97223700 -----  
Tbg97223620 -----  
Tbg97223490 -----  
Tbg97223660 -----  
Tbg97223640 -----  
Tb92725350 -----  
Tbg97223330 -----  
Tb92725290 -----  
Tbg97223720 -----  
Tb92725320 -----  
Tbg97223350 -----  
Tbg97223500 -----  
Tb92725300 -----  
Tb92725310 -----  
Tbg97222800 -----  
Tb92724760 -----  
Tbg97222940 -----  
Tb92724920 -----  
TcIL30002110 -----  
TcIL3000013740 -----  
TcIL3000027940 -----  
TcIL3000001110 -----  
TcIL3000033420 -----  
Tb9276380 -----  
Tbg972630 -----  
Tb9276370 -----  
TcIL3000050510 -----  
TcIL3000050500 -----  
TcIL3000016620 -----  
TcIL3000016630 -----  
TcIL3000047260 ----- NGTDANETASEELNGTDANETASEELNGTDANETASEELNGTDANETASEELNGTDANET

Tbg97291330 -----  
Tbg97291280 -----  
Tbg97291270 -----  
Tbg97291300 -----  
Tb09v40146 -----  
Tb09v40147 -----  
Tb091601520 -----  
Tb09v40149 -----  
Tb09v40059 -----  
Tb09v40058 -----  
Tb09v40148 -----  
Tbg97291380 -----  
Tb09v40060 ----- DGNTSEDKNTTSHENRSYDDSSVADGNTSEDKNTTSHENRSYGDTSVADLSSSDDESTSD  
Tbg97291360 ----- DGNTSDDKNTTSHENRSYDDSSVADGNTSDDKNTTSHENRSCDDSSVADGNTSDDDESTSD  
Tc00104705351105310 -----  
Tc00104705350763120 -----  
Tc00104705350401180 -----  
Tc001047053511859200 -----  
Tc00104705350601110 -----  
Tc00104705351104770 -----  
Tc00104705350453350 -----

|                                                              |       |
|--------------------------------------------------------------|-------|
| Tc001047053508735100                                         | ----- |
| Tc0010475350894510                                           | ----- |
| Tc00104705350863740                                          | ----- |
| Tc00104705351112960                                          | ----- |
| Tc00104705351191190                                          | ----- |
| Tc00104705351024930                                          | ----- |
| Tc00104705350735910                                          | ----- |
| TvY486_0201870                                               | ----- |
| TvY486_0600050                                               | ----- |
| TvY486_0028480                                               | ----- |
| TvY486_0201850                                               | ----- |
| Tbg97223580                                                  | ----- |
| Tbg97223450                                                  | ----- |
| Tbg97223390                                                  | ----- |
| Tbg97223430                                                  | ----- |
| Tbg97223760                                                  | ----- |
| Tbg97223550                                                  | ----- |
| Tbg97223410                                                  | ----- |
| Tbg97223680                                                  | ----- |
| Tbg97223740                                                  | ----- |
| Tbg97223540                                                  | ----- |
| Tb92725360                                                   | ----- |
| Tb92725340                                                   | ----- |
| Tb92725330                                                   | ----- |
| Tbg97223600                                                  | ----- |
| Tbg97223520                                                  | ----- |
| Tbg97223370                                                  | ----- |
| Tbg97223470                                                  | ----- |
| Tbg97223700                                                  | ----- |
| Tbg97223620                                                  | ----- |
| Tbg97223490                                                  | ----- |
| Tbg97223660                                                  | ----- |
| Tbg97223640                                                  | ----- |
| Tb92725350                                                   | ----- |
| Tbg97223330                                                  | ----- |
| Tb92725290                                                   | ----- |
| Tbg97223720                                                  | ----- |
| Tb92725320                                                   | ----- |
| Tbg97223350                                                  | ----- |
| Tbg97223500                                                  | ----- |
| Tb92725300                                                   | ----- |
| Tb92725310                                                   | ----- |
| Tbg97222800                                                  | ----- |
| Tb92724760                                                   | ----- |
| Tbg97222940                                                  | ----- |
| Tb92724920                                                   | ----- |
| TcIL30002110                                                 | ----- |
| TcIL3000013740                                               | ----- |
| TcIL3000027940                                               | ----- |
| TcIL3000001110                                               | ----- |
| TcIL3000033420                                               | ----- |
| Tb9276380                                                    | ----- |
| Tbg972630                                                    | ----- |
| Tb9276370                                                    | ----- |
| TcIL3000050510                                               | ----- |
| TcIL3000050500                                               | ----- |
| TcIL3000016620                                               | ----- |
| TcIL3000016630                                               | ----- |
| TcIL3000047260                                               | ----- |
| ASEELNGTDANETASEELNGTDANETASEELNGTDTNETASEELNGTDANETASEELNGT |       |

|                      |                                                           |
|----------------------|-----------------------------------------------------------|
| Tbg97291330          | -----ENTTVDENTTVDEN-----                                  |
| Tbg97291280          | -----TTVDEN-----                                          |
| Tbg97291270          | -----TTVDENTTVDEN-----                                    |
| Tbg97291300          | -----TTVDENTTVDEN-----                                    |
| Tb09v40146           | -----ENTTVDENTTVDEN-----                                  |
| Tb09v40147           | -----ENTTVDENTTVDEN-----                                  |
| Tb091601520          | -----TTADENATADEN-----                                    |
| Tb09v40149           | -----TTADENTTADEN-----                                    |
| Tb09v40059           | -----ENTNVDETTADEN-----                                   |
| Tb09v40058           | -----TNVDENTTADEN-----                                    |
| Tb09v40148           | -----ENTTVDENTTVDEN-----                                  |
| Tbg97291380          | -----ENTTADENTNADGNTTVDETTADGN-----                       |
| Tb09v40060           | DESTSDYESTADEEYSLYNN---GIWKENTTADENTTADENTTVDETTADEN----- |
| Tbg97291360          | DESTSDYESTADEEYSLYNN---GIWKENTTADENTTVDETTADENTTVDEN----- |
| Tc00104705351105310  | -----VVCETOEGYV-----                                      |
| Tc00104705350763120  | -----VVCETOEGYV-----                                      |
| Tc00104705350401180  | -----VVCETOEGYV-----                                      |
| Tc001047053511859200 | -----VVCETOEGYV-----                                      |

Tc00104705350601110 -----VVCETQEGYV-----  
Tc00104705351104770 -----VVCETQEGYV-----  
Tc00104705350453350 -----VVCETQKGYV-----  
Tc001047053508735100 -----VVCETQKGYV-----  
Tc0010475350894510 -----VVCEAQKGYV-----  
Tc00104705350863740 -----VVCEAQKGYV-----  
Tc00104705351112960 -----VVCEAQKGYV-----  
Tc00104705351191190 -----VVCEAQKGYV-----  
Tc00104705351024930 -----VVCEAQKGYV-----  
Tc00104705350735910 -----VVCEAQKGYV-----  
TvY486\_0201870 -----PT-----KTTTTT-----TSAPDVSEWV-----  
TvY486\_0600050 -----PT-----TTTTTT-----TSAPDVSEWV-----  
TvY486\_0028480 -----GHHPTGSAVTAVTATKPPPTSAVDSEWV-----  
TvY486\_0201850 -----SSGPGGGAAGTPSSS--SG-TASATSPGPV-----  
Tbg97223580 -----TVTKDEEVT-----  
Tbg97223450 -----TVTKDEEVT-----  
Tbg97223390 -----TVTKDEEVT-----  
Tbg97223430 -----TVTKDEEVT-----  
Tbg97223760 -----TVTKDEEVT-----  
Tbg97223550 -----TVTKDEEVT-----  
Tbg97223410 -----TVTKDEEVT-----  
Tbg97223680 -----TVTKDEEVT-----  
Tbg97223740 -----TVTKDEEVT-----  
Tbg97223540 -----TVTKDEEVT-----  
Tb92725360 -----TVTKDEEVT-----  
Tb92725340 -----TVTKDEEVT-----  
Tb92725330 -----TVTKDEEVT-----  
Tbg97223600 -----TVTKDEEVT-----  
Tbg97223520 -----TVTKDEEVT-----  
Tbg97223370 -----TVTKDEEVT-----  
Tbg97223470 -----TVTKDEEVT-----  
Tbg97223700 -----TVTKDEEVT-----  
Tbg97223620 -----TVTKDEEVT-----  
Tbg97223490 -----TVTKDEEVT-----  
Tbg97223660 -----TVTKDEEVT-----  
Tbg97223640 -----TVTKDEEVT-----  
Tb92725350 -----TVTKDEEVT-----  
Tbg97223330 -----TVTKDEEVT-----  
Tb92725290 -----TVTKDEEVT-----  
Tbg97223720 -----TVTKDEEVT-----  
Tb92725320 -----TVTKDEEVT-----  
Tbg97223350 -----TVTKDEEVT-----  
Tbg97223500 -----TVTKDEEVT-----  
Tb92725300 -----TVTKDEEVT-----  
Tb92725310 -----TVTKDEEVT-----  
Tbg97222800 -----TVTKDEEVT-----  
Tb92724760 -----TVTKDEEVT-----  
Tbg97222940 -----TVTKDEEVT-----  
Tb92724920 -----TVTKDEEVT-----  
TcIL30002110 -----TTTTTAEPENT-T-----  
TcIL3000013740 -----TTTTTAEPENT-T-----  
TcIL3000027940 -----TTTTTAEPENT-T-----  
TcIL300001110 -----TTTTTKEPENN-T-----  
TcIL3000033420 -----TTTTTKEPENTTT-----  
Tb9276380 -----STNSQDQ-----  
Tbg972630 -----STNSQDQ-----  
Tb9276370 -----STNSQDQ-----  
TcIL3000050510 -----SEDSSSG-----  
TcIL3000050500 -----GTNANETASEELNGTNANETESDDSSSG-----  
TcIL3000016620 -----SDDSSSG-----  
TcIL3000016630 -----SDDSSSG-----  
TcIL3000047260 NANETASEELNGTDTNETASEELNGTNANETASEELNGTDANETASEDPSG-----

Tbg97291330 TNTDEISNGSNEASDKTVPSTASDGE GSGGAGAAVVIIFILLVLLVLLYFCCFAG--H  
Tbg97291280 TNTDEISNGSNEASDKTVPSTSSDGE GSGGAGAAVVIIFILLVLLVLLYFCCFAG--H  
Tbg97291270 TNTDEISNGSNEASDKTVPSTASDGE GSGGAGAAVVIIFILLVLLVLLYFCCFAG--H  
Tbg97291300 TNTDEISNGSNEASDKTVPSTASDGE GSGGAGAAVVIIFILLVLLVLLYFCCFAG--H  
Tb09v40146 TNADEISNGSNEASDKTVPSTASDGE GSGGAGAAVVIIFILLAVLLLILLYFCCFAG--H  
Tb09v40147 TNADEISNGSNEASDKTVPSTASDGE GSGGAGAAVVIIFILLAVLLLILLYFCCFAG--H  
Tb091601520 TIADEISNGSNEASDKTVPSTASDGE GSGGAGAAVVIIFILLAVLLLILLYFCCFAG--H  
Tb09v40149 TNADEISNGSNEASDKTVPSTASDGE GSGGAGAAVVIIFILLAVLLLILLYFCCFAG--H  
Tb09v40059 TIADEISNGSNEASDKTVPSTASDGE GSGGAGAAVVIIFILLAVLLLILLYFCCFAG--H  
Tb09v40058 TIADEISNGSNEASDKTVPSTASDGE GSGGAGAAVVIIFILLAVLLLILLYFCCFAG--H  
Tb09v40148 TNADEISNGSNEASDKTVPSTASDGE GSGGAGAAVVIIFILLAVLLLILLYFCCFAG--H  
Tbg97291380 TTADEISNGSNEASDKTVPSTASDGE GSGGAGAAVVIIFILLVLLVLLYFCCFAG--H  
Tb09v40060 TNADEISNGSNEASDKTVPSTASDGE GSGGAGAAVVIIFILLAVLLLILLYFCCFAG--H  
Tbg97291360 TNTDEISNGSNEASDKTVPSTSSDGE GSGGAGAAVVIIFILLVLLVLLYFCCFAG--H  
Tc00104705351105310 VSTTTLPPT-----VEISVWHKRWYVILIAILVPIVAVAIITVCFRSCGHDH

Tc00104705350763120 VSTTTLPPPT-----VEIPWVHKRWYVILIAILVPVIVAVAIITVYFCRSCGGHDE  
Tc00104705350401180 VSTTTLPPPT-----VEIPWVHKRWYVILIAILVPVIVAVAIITACFCRCRGADDE  
Tc001047053511859200 VSTTTLPPPT-----VEISWVRKNWYFVLIILVPVIVAVAILITVCFRCRCRGGADDE  
Tc00104705350601110 VSTTTLPPPT-----VKISWVHKRWYVILIAILVPVIVAVTLITVCFRCRCRGGADDE  
Tc00104705351104770 VSTTTLPPA-----VEISWVQKNWYFVLAAILVPVIVAVVLLITACFCRCRCRGGADDE  
Tc00104705350453350 VSTTTLPPA-----IVVPWLQKNWYVVLIVVLLPVVVAVALITVCFYRCRGGVDE  
Tc001047053508735100 VSTTTLPPA-----VVVPWLQKNWYVVLIVVLLPVVVAVALITVCFYRCRGGVDE  
Tc0010475350894510 VSTTTLPPA-----VVVPWLQKNWYVVLAVLLPVIAAALITVCFYRCRGGV-DE  
Tc00104705350863740 VSTTTLPPA-----VVVPWLQKNWYFVLLAVLLPVIAAALITVCFYRCRGGVYDE  
Tc00104705351112960 VSTTTLPPA-----VVVPWLQKNWYVVLMAVLLPVIAAVALITVCFYRCRGGVEDE  
Tc00104705351191190 VSTTTLPPA-----VVVPWLQKNWYVVLIAVLLPVIAAVALITVCFYRCRGGVDE  
Tc00104705351024930 VSTTTLPPA-----VVVPWLQKNWYVVLIAVLLPVIAAVALITVCFYRCRGGVDE  
Tc00104705350735910 VSTTTLPPA-----VVVPWLQKNWYFVLAAILPVIAAVALITVCFRCRCRGGVDE  
TvY486\_0201870 SSATFVPPVPGAKQVGRDASSTWAERYWYVILLGLLVAIAAVLIVLCLCLRCCAG--D  
TvY486\_0600050 SSATFVPPVPGAKQVGRDASSTWAERYWYVILLGLLVAIAAVLIVLCLCLRCCAG--D  
TvY486\_0028480 SSATFVPPVPGAKQVGRDASSTWAERYWYVILLGLLVAIAAVLIVLCLCLRCCAG--D  
TvY486\_0201850 GNATSAPPVPGGAGHAGLGASSTWAERYWYVILLVFLSVIVAIVLIVLFLVFCRSR--D  
Tbg97223580 VTTASLEERS-----NWHIILIALISVSVLIVLFLFLRWFCYDYN--V  
Tbg97223450 VTTASLEERS-----NWHIILIALISVSVLIVLFLFLRWFCYDYN--V  
Tbg97223390 VTTASLEERS-----NWHIILIALISVSVLIVLFLFLRWFCYDYN--V  
Tbg97223430 VTTASLEERS-----NWHIILIALISVSVLIVLFLFLRWFCYDYN--V  
Tbg97223760 VTTASLEERS-----NWHIILIALISVSVLIVLFLFLRWFCYDYN--V  
Tbg97223550 VTTASLEERS-----NWHIILIALISVSVLIVLFLFLRWFCYDYN--V  
Tbg97223410 VTTASLEERS-----NWHIILIALISVSVLIVLFLFLRWFCYDYN--V  
Tbg97223680 VTTASLEERS-----NWHIILIALISVSVLIVLFLFLRWFCYDYN--V  
Tbg97223740 VTTASLEERS-----NWHIILIALISVSVLIVLFLFLRWFCYDYN--V  
Tbg97223540 VTTASLEERS-----NWHIILIALISVSVLIVLFLFLRWFCYDYN--V  
Tb92725360 VTTVSLERS-----NWHIILIALISVSVLIVLFLFLRWFCYD--V  
Tb92725340 VTTVSLERS-----NWHIILIALISVSVLIVLFLFLRWFCYD--V  
Tb92725330 VTTVSLERS-----NWHIILIALISVSVLIVLFLFLRWFCYD--V  
Tbg97223600 VTTVSLERS-----NWHIILIALISVVALIVLFLFLRWFCYDYN--V  
Tbg97223520 VTTVSLERS-----NWHIILIALISVVALIVLFLFLRWFCYDYN--V  
Tbg97223370 VTTVSLERS-----NWHIILIALISVVALIVLFLFLRWFCYDYN--V  
Tbg97223470 VTTVSLERS-----NWHIILIALISVVALIVLFLFLRWFCYDYN--V  
Tbg97223700 VTTVSLERS-----NWHIILIALISVVALIVLFLFLRWFCYDYN--V  
Tbg97223620 VTTVSLERS-----NWHIILIALISVVALIVLFLFLRWFCYDYN--V  
Tbg97223490 VTTVSLERS-----NWHIILIALISVVALIVLFLFLRWFCYDYN--V  
Tbg97223660 VTTVSLERS-----NWHIILIALISVSVLIVLFLFLRWFCYDYN--V  
Tbg97223640 VTTVSLERS-----NWHIILIALISVVALIVLFLFLRWFCYDYN--V  
Tb92725350 VTTVSLERS-----NWHIILIALISVSVLIVLFLFLRWFCYD--V  
Tbg97223330 VTTVSLERS-----NWHIILIALISVVALIVLFLFLRWFCYDYN--V  
Tb92725290 VTTVSLERS-----NWHIILIALISVSVLIVLFLFLRWFCYD--V  
Tbg97223720 VTTVSLERS-----NWHIILIALISVSVLIVLFLFLRWFCYDYN--V  
Tb92725320 VTTVSLERS-----NWHIILIALISVSVLIVLFLFLRWFCYD--V  
Tbg97223350 VTTVSLERS-----NWHIILIALISVSVLIVLFLFLRWFCYDYN--V  
Tbg97223500 VTTVSLERS-----NWHIILIALISVSVLIVLFLFLRWFCYDYN--V  
Tb92725300 VTTVSLERS-----NWHIILIALISVSVLIVLFLFLRWFCYD--V  
Tb92725310 VTTVSLERS-----NWHIILIALISVSVLIVLFLFLRWFCYD--V  
Tbg97222800 VTTASLEERI-----DLIILIALISVSVLIVLFLFLRWFCYDYN--V  
Tb92724760 VTTVSLERI-----DLIILIALISVSVLIVLFLFLRWFCYDYN--V  
Tbg97222940 VTTASLEERS-----NWHIILIALISVVALIVLFLFLRWFCYDYN--V  
Tb92724920 VTTASLEERS-----NWHIILIALISVSVLIVLFLFLRWFCYDYN--V  
TcIL30002110 TTTTAQPEASEGK-GSG-----YIILIVLFLLAALIALLLAYCCFSAG--G  
TcIL3000013740 TTTTAQPEASEGK-GSG-----YIILIVLFLLAALIALLLAYCCFSAG--G  
TcIL3000027940 TTTTAQPEASEGK-GSG-----YIILIVLFLLAALIALLLAYCCFSAG--G  
TcIL3000001110 TTTTAQPEASEGSDGSSG-ASTSWGTRNWIILIVLFLLAALIALLLAYCCFSAG--G  
TcIL3000033420 TTTTAQPEASEGSDGSSG-ASASWGTRNWIILIVLFLLAALIALLLAYCCFSAG--G  
Tb9276380 PSATPKPKGE-----AETTLTSLSHITICVGGELCLLIVFFSLAIV--C  
Tbg972630 PSATPKPKGE-----AETTLTSLSHITICVGGELCLLIVFFSLAIV--C  
Tb9276370 PSATPKPKGE-----AETTLTSLSHITICVGGELCLLIVFFSLAIV--C  
TcIL3000050510 VSSTEAPAGK-----VNGGVLAVAILLPIIAIALLLLWYFCFRRR--D  
TcIL3000050500 VSSTEAPAGK-----VNGGVLAVAILLPIIAIALLLLWYFCFRRR--D  
TcIL3000016620 VSSTEAPAGK-----VNGGVLALAILLPIIAIALLLLWYFCFRRR--D  
TcIL3000016630 VSSTEAPAGK-----VNGGVLAVAILLPIIAIALLLLWYFCFRRR--D  
TcIL3000047260 VSSTAAPAGK-----VNGGVLALAILLPIIAIVLFLWYFCVWGK--N

: ; :

Tbg97291330 EKYITVMSLREKVTSP---VSNVEAAEVAAP-----SNGEEHLSITSHOQETP  
Tbg97291280 EKYITVMSLREKVTSP---VSNVEAAEVAAP-----SNGEEHLSITSHOQETP  
Tbg97291270 EKYITVMSLREKVTSP---VSNVEAAEVAAP-----SNGEEHLSITSHOQETP  
Tbg97291300 EKYITVMSLREKVTSP---VSNVEAAEVAAP-----SNGEEHLSITSHOQETP  
Tb09v40146 EKYITVMSLREKVTSP---VSNVEAAEVAAP-----SNGEEHLSITSHOQETP  
Tb09v40147 EKYITVMSLREKVTSP---VSNVEAAEVAAP-----SNGEEHLSITSHOQETP  
Tb091601520 EKYITVMSLREKVTSP---VSNVEAAEVAAP-----SNGEEHLSITSHOQETP  
Tb09v40149 EKYITVMSLREKVTSP---VSNVEAAEVAAP-----SNGEEHLSITSHOQETP  
Tb09v40059 EKYITVMSLREKVTSP---VSNVEAAEVAAP-----SNGEEHLSITSHOQETP  
Tb09v40058 EKYITVMSLREKVTSP---VSNVEAAEVAAP-----SNGEEHLSITSHOQETP  
Tb09v40148 EKYITVMSLREKVTSP---VSNVEAAEVAAP-----SNGEEHLSITSHOQETP  
Tbg97291380 EKYITVMSLREKVTSP---VSNVEAAEVAAP-----SNGEEHLSITSHOQETP

|                      |                                                               |
|----------------------|---------------------------------------------------------------|
| Tb09v40060           | EKYITVMSLREKVTSP---VSNVEAAEVAAPV-----SNGEEHLSITNHQOETP        |
| Tbg97291360          | EKYITVMSLREKVTSP---VSNVEAAEVAAPV-----SNGEEHLSITSHQOETP        |
| Tc00104705351105310  | SKWVVHMLREVNGEP---LHPIDGDDGIYND-DSPMMRYSTLGDGVPMTAPSGYENVEV   |
| Tc00104705350763120  | SKWVVHMLREVNGEP---LHPIDGDDGIYND-DSPMMRYSTLGDGVPMTAPSGYENVEV   |
| Tc00104705350401180  | SKWVVHMLREVNSEP---LHPIDGDDGIYND-DSQMMRYSTLGDGVPMTAPSGYENVEV   |
| Tc001047053511859200 | SKWVVHMLREVNGKP---LHPIDGDDGIYND-NSPMMRYSTLGDGVPMTTPFAYENVEV   |
| Tc00104705350601110  | SKWVVHMLREVNSEP---LHPIDGDDGIYND-NSPMMRYSTLGDGVPMTTPFAYENVEV   |
| Tc00104705351104770  | SKWVVHMLREVNGKP---FHVTDNRNGGIYND-DSPMMRYSTLGDGVPMTAPFAYENVEV  |
| Tc00104705350453350  | SKWVVHMLREINDNP---LYAIDRNDGIYNN-DGQMKQDSTLGDGMP'TTPSWHENAIEV  |
| Tc001047053508735100 | SKWVAHMLREINDNP---LYAIDRNDGIHNN-DSQMKQDSTLGDGMP'TTPVSEHENAIEV |
| Tc0010475350894510   | SKWVVHMLREMNDNP---LYAIDRNDRIHNN-NG-LMLDATLGDDEVLMTPVPGYEFV    |
| Tc00104705350863740  | SKWVVHMLREMNDNP---LYAIDRNDRIHNN-NG-LMLDATLGDDEVLMNVVPGYEFV    |
| Tc00104705351112960  | SKWVVHMLREVKREP---LYAIDGNDGIYNN-NGQMLRSLTLGDDEVVMTVPSGYEFV    |
| Tc00104705351191190  | SKWVVHMLREVKREP---LYAIDGNDGIYNN-NSQMLRSLTLGDDEVLMTPVSGYENFEV  |
| Tc00104705351024930  | SKWVVHMLREMNDSP---LYAIDGNDGIHNN-NSQMLRSLTLGDDEVLTTPVSGYGNFEV  |
| Tc00104705350735910  | SKWVVHMLREVKREP---LYAIDRNDGIHND-ASQMKEDSTLGDGMPMTVSSGHENAIEV  |
| TvY486_0201870       | GEKVTMVLRESAGAPLCVAVPVGDGDYAD-----VPPFVPSHADGAGY              |
| TvY486_0600050       | GEKVTMVLRESAGAPLCVAVPVGDGDYAD-----VPPFVPSHADGAGY              |
| TvY486_0028480       | GEKVTMVLRESAGAPLCVAVPVGDGDYAD-----VPPFVPSHADGMWL              |
| TvY486_0201850       | GEKVTMVLRESFHPV-YMVGTTANDTGAYAD-----APPFVPPQNRGMER            |
| Tbg97223580          | KKEIIPMTVREVVGEP---LFVLESTPFVPPE-----GFAAPPLALQYYNQMR         |
| Tbg97223450          | -----                                                         |
| Tbg97223390          | KKEIIPMTLREVVGEP---LFVLESTPFVPPE-----GFAAPPLALQYYNQMR         |
| Tbg97223430          | KKEIIPMTLREVVGEP---LFVLESTPFVPPE-----GFAAPPLALQYYNQMR         |
| Tbg97223760          | KKEIIPMTLREVVGEP---LFVLESTPFVPPE-----GFAAPPLALQYYNQMR         |
| Tbg97223550          | KKEIIPMTLREVVGEP---LFVLESTPFVPPE-----GFAAPPLALQYYNQMR         |
| Tbg97223410          | KKEIIPMTLREVVGEP---LFVLESTPFVPPE-----GFAAPPLALQYYNQMR         |
| Tbg97223680          | KKEIIPMTLREVVGEP---LFVLESTPFVPPE-----GFAAPPLALQYYNQMR         |
| Tbg97223740          | KKEIIPMTLREVVGEP---LFVLESTPFVPPE-----GFAAPPLALQYYNQMR         |
| Tbg97223540          | KKEIIPMTLREVVG-----                                           |
| Tb92725360           | KKEIIPMTLREVVGEP---LFVLESTPFVPPE-----GFAAPPLALQYYNQMR         |
| Tb92725340           | KKEIIPMTLREVVGEP---LFVLESTPFVPPE-----GFAAPPLALQYYNQMR         |
| Tb92725330           | KKEIIPMTLREVVGEP---LFVLESTPFVPPE-----GFAAPPLALQYYNQMR         |
| Tbg97223600          | KKEIIPMTLREVVGEP---LFVLESTPFVPPE-----GFAAPPLALQYYNQMR         |
| Tbg97223520          | KKEIIPMTLREVVGEP---LFVLESTPFVPPE-----GFAAPPLALQYYNQMR         |
| Tbg97223370          | KKEIIPMTLREVVGEP---LFVLESTPFVPPE-----GFAAPPLALQYYNQMR         |
| Tbg97223470          | KKEIIPMTLREVVGEP---LFVLESTPFVPPE-----GFAAPPLALQYYNQMR         |
| Tbg97223700          | KKEIIPMTLREVVGEP---LFVLESTPFVPPE-----GFAAPPLALQYYNQMR         |
| Tbg97223620          | KKEIIPMTLREVVGEP---LFVLESTPFVPPE-----GFAAPPLALQYYNQMR         |
| Tbg97223490          | KKEIIPMTLREVVGEP---LFVLESTPFVPPE-----GFDAPPLALQYYD----        |
| Tbg97223660          | KKEIIPMTLREVVGEP---LFVLESTPFVPPE-----GFAAPPLALQYYNQMR         |
| Tbg97223640          | KKEIIPMTLREVVGEP---LFVLESTPFVPPE-----GFAAPPLALQYYNQMR         |
| Tb92725350           | KKEIIPMTLREVVGEP---LFVLESTPFVPPE-----GFAAPPLALQYYNQMR         |
| Tbg97223330          | KKEIIPMTLREVVGEP---LFVLESTPFAPPE-----GFAAPPLALQYYNQMR         |
| Tb92725290           | KKEIIPMTLREVVGEP---LFVLESTPFVPPE-----GFAAPPLALQYYNQMR         |
| Tbg97223720          | KKEIIPMTLREVVGEP---LFVLESTPFVPPE-----GFAAPPLALQYYNQMR         |
| Tb92725320           | KKEIIPMTLREVVGEP---LFVLESTPFVPPE-----GFDAPPLALQYYNQMR         |
| Tbg97223350          | KKEIIPMTLREVVGEP---LFVLESTPFVPPE-----GFAAPPLALQYYNQMR         |
| Tbg97223500          | KKEIIPMTLREVVGEP---LFVLESTPFVPPE-----GFAAPPLALQYYNQMR         |
| Tb92725300           | KKEIIPMTLREVVGEP---LFVLESTPFVPPE-----GFAAPPLALQYYNQMR         |
| Tb92725310           | KKEIIPMTLREVVGEP---LFVLESTPFAPPE-----GFAAPPLALQYYNQMR         |
| Tbg97222800          | KKEIIPMTLREVVGEP---LFVLESTPFVPPE-----GFAAPPLALQYYNQMMT        |
| Tb92724760           | KKEIIPMTLREVVGEP---LFVLESTPFVPPE-----GFAAPPLALQYYNQMMT        |
| Tbg97222940          | KKEIIPMTLREVVGEP---LFVLESTPFVPPE-----GFDAPPLALQYYD----        |
| Tb92724920           | KKEIIPMTLREVVGEP---LFVLESTPFAPPE-----GFDAPPLALQYYG----        |
| TcIL30002110         | GKELTPMTLREVTGLP---VRAVEPESYAAPD-----EAYDIPQPLGYHYAQGN        |
| TcIL3000013740       | GKELTPMTLREVTGLP---VRAVEPESYAAPD-----EAYDIPQPLGYHYAQGN        |
| TcIL3000027940       | GKELTPMTLREVTGLP---VRAVEPESYAAPD-----EAYDIPQPLGYHYAQGN        |
| TcIL3000001110       | GKELTPMTLREVCGLP---LCAADSESYAAPD-----EAYDIPQPLSYHNAQGH        |
| TcIL3000033420       | GKELTPMTLREVCGLP---LCAAGSESYAAPD-----EAYGIPPPQSYHNAQGH        |
| Tb9276380            | -----                                                         |
| Tbg972630            | -----                                                         |
| Tb9276370            | -----                                                         |
| TcIL3000050510       | EKEDTPLSLREVYSPA---ECPSPEAPLTSE-----GGGAAEGGSPNASPAVA         |
| TcIL3000050500       | EKEDAPLSLREVYSPA---ECPSPEAPLTSE-----GGGAAEGGSPNASPAVA         |
| TcIL3000016620       | EKEDAPLSLREVYSPA---ECPSPEAPLTSE-----GGGAAEGGSPNASPVVA         |
| TcIL3000016630       | EKEDAPLSLREVYSPA---ECPSPEAPLTSE-----GGGAAEGGSPNASPAVA         |
| TcIL3000047260       | DKEITCMRLRETFLSP---ACLSPAEVPLTNG-----GGGVAKAGSPNASPMGA        |
| Tbg97291330          | AADE-----                                                     |
| Tbg97291280          | AADE-----                                                     |
| Tbg97291270          | AGDE-----                                                     |
| Tbg97291300          | AGDE-----                                                     |
| Tb09v40146           | AVDE-----                                                     |
| Tb09v40147           | AADE-----                                                     |
| Tb091601520          | AADE-----                                                     |
| Tb09v40149           | AADE-----                                                     |
| Tb09v40059           | AADE-----                                                     |



|                      |                    |
|----------------------|--------------------|
| Tb09v40058           | AADE-----          |
| Tb09v40148           | AVDE-----          |
| Tbg97291380          | AGDE-----          |
| Tb09v40060           | AADE-----          |
| Tbg97291360          | AADE-----          |
| Tc00104705351105310  | PRVIKNQETTVYDDGDVL |
| Tc00104705350763120  | PRVIKNQETTVYDDGDVL |
| Tc00104705350401180  | PRVIKNQETTVYDDGDVF |
| Tc001047053511859200 | PRVIKNQENTVYDDGDVF |
| Tc00104705350601110  | PRVIKNQENTVYDDGDVF |
| Tc00104705351104770  | PKVIKNE-----       |
| Tc00104705350453350  | PTVIASQESTVYDLGDVF |
| Tc001047053508735100 | PTVIASQESTVYDLGDIL |
| Tc0010475350894510   | PTVIKNQGSTVYDDGDVA |
| Tc00104705350863740  | PTVIKNQGSTVYDDGDVF |
| Tc00104705351112960  | PTVIKNQGSTVYDDGDVV |
| Tc00104705351191190  | PKVVKNQGSTVYDDGDVA |
| Tc00104705351024930  | PKVIKNQGSTVYDDGDVA |
| Tc00104705350735910  | PKVTASQESTVYDFGDIL |
| TvY486_0201870       | DGAW-----          |
| TvY486_0600050       | DGAW-----          |
| TvY486_0028480       | PQC-----           |
| TvY486_0201850       | VHAW-----          |
| Tbg97223580          | SE-----            |
| Tbg97223450          | -----              |
| Tbg97223390          | SE-----            |
| Tbg97223430          | SE-----            |
| Tbg97223760          | SE-----            |
| Tbg97223550          | SE-----            |
| Tbg97223410          | SE-----            |
| Tbg97223680          | SE-----            |
| Tbg97223740          | SE-----            |
| Tbg97223540          | -----              |
| Tb92725360           | SE-----            |
| Tb92725340           | SE-----            |
| Tb92725330           | SE-----            |
| Tbg97223600          | SE-----            |
| Tbg97223520          | SE-----            |
| Tbg97223370          | SE-----            |
| Tbg97223470          | SE-----            |
| Tbg97223700          | SE-----            |
| Tbg97223620          | SE-----            |
| Tbg97223490          | -----              |
| Tbg97223660          | SE-----            |
| Tbg97223640          | SE-----            |
| Tb92725350           | SE-----            |
| Tbg97223330          | SE-----            |
| Tb92725290           | SE-----            |
| Tbg97223720          | SE-----            |
| Tb92725320           | SE-----            |
| Tbg97223350          | SE-----            |
| Tbg97223500          | SE-----            |
| Tb92725300           | SE-----            |
| Tb92725310           | SE-----            |
| Tbg97222800          | GQSY-----          |
| Tb92724760           | GQSY-----          |
| Tbg97222940          | -----              |
| Tb92724920           | -----              |
| TcIL30002110         | GDEW-----          |
| TcIL3000013740       | GDEW-----          |
| TcIL3000027940       | GDEW-----          |
| TcIL3000001110       | EGQW-----          |
| TcIL3000033420       | EGQW-----          |
| Tb9276380            | -----              |
| Tbg972630            | -----              |
| Tb9276370            | -----              |
| TcIL3000050510       | Q-----             |
| TcIL3000050500       | Q-----             |
| TcIL3000016620       | Q-----             |
| TcIL3000016630       | Q-----             |
| TcIL3000047260       | R-----             |

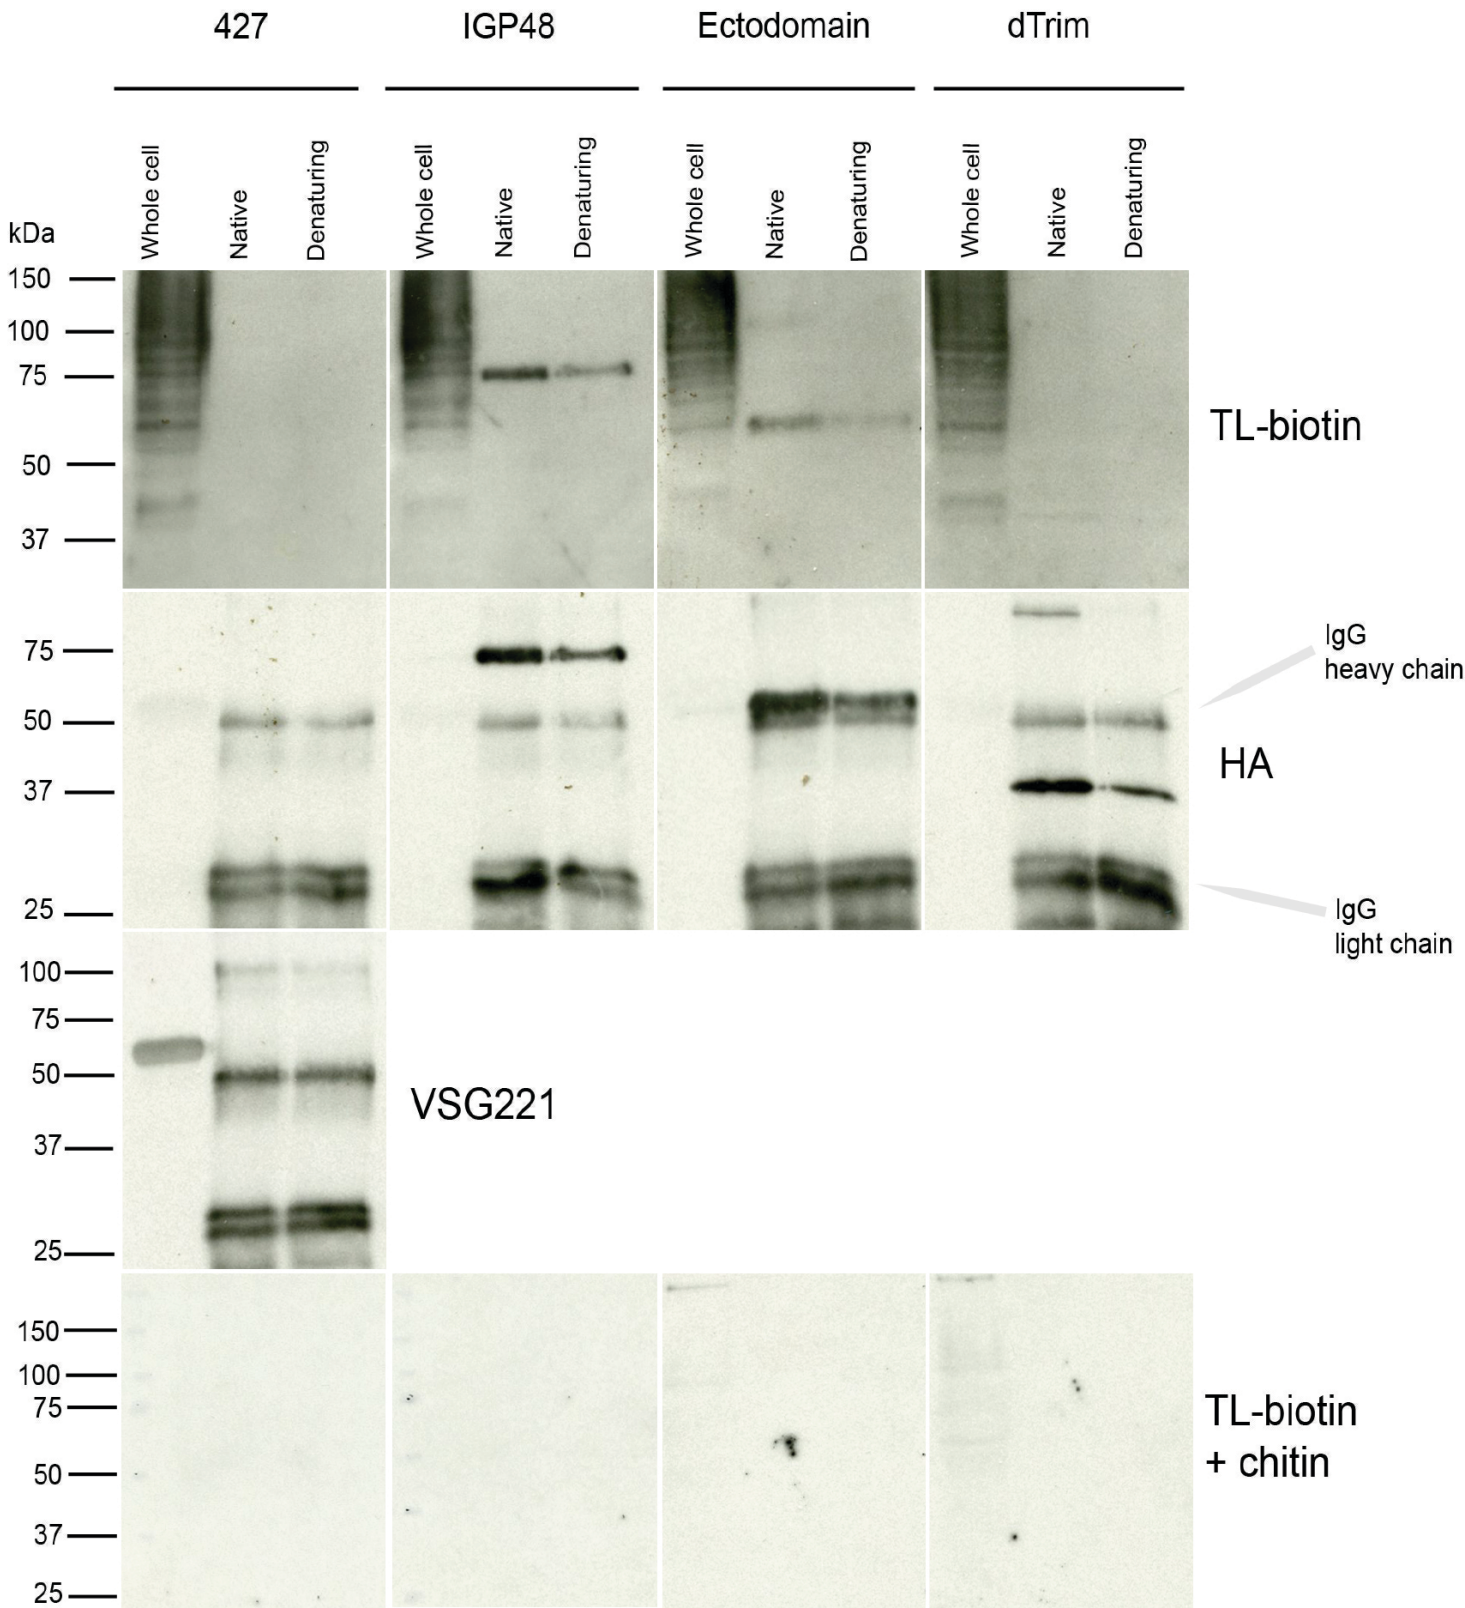

Figure S4

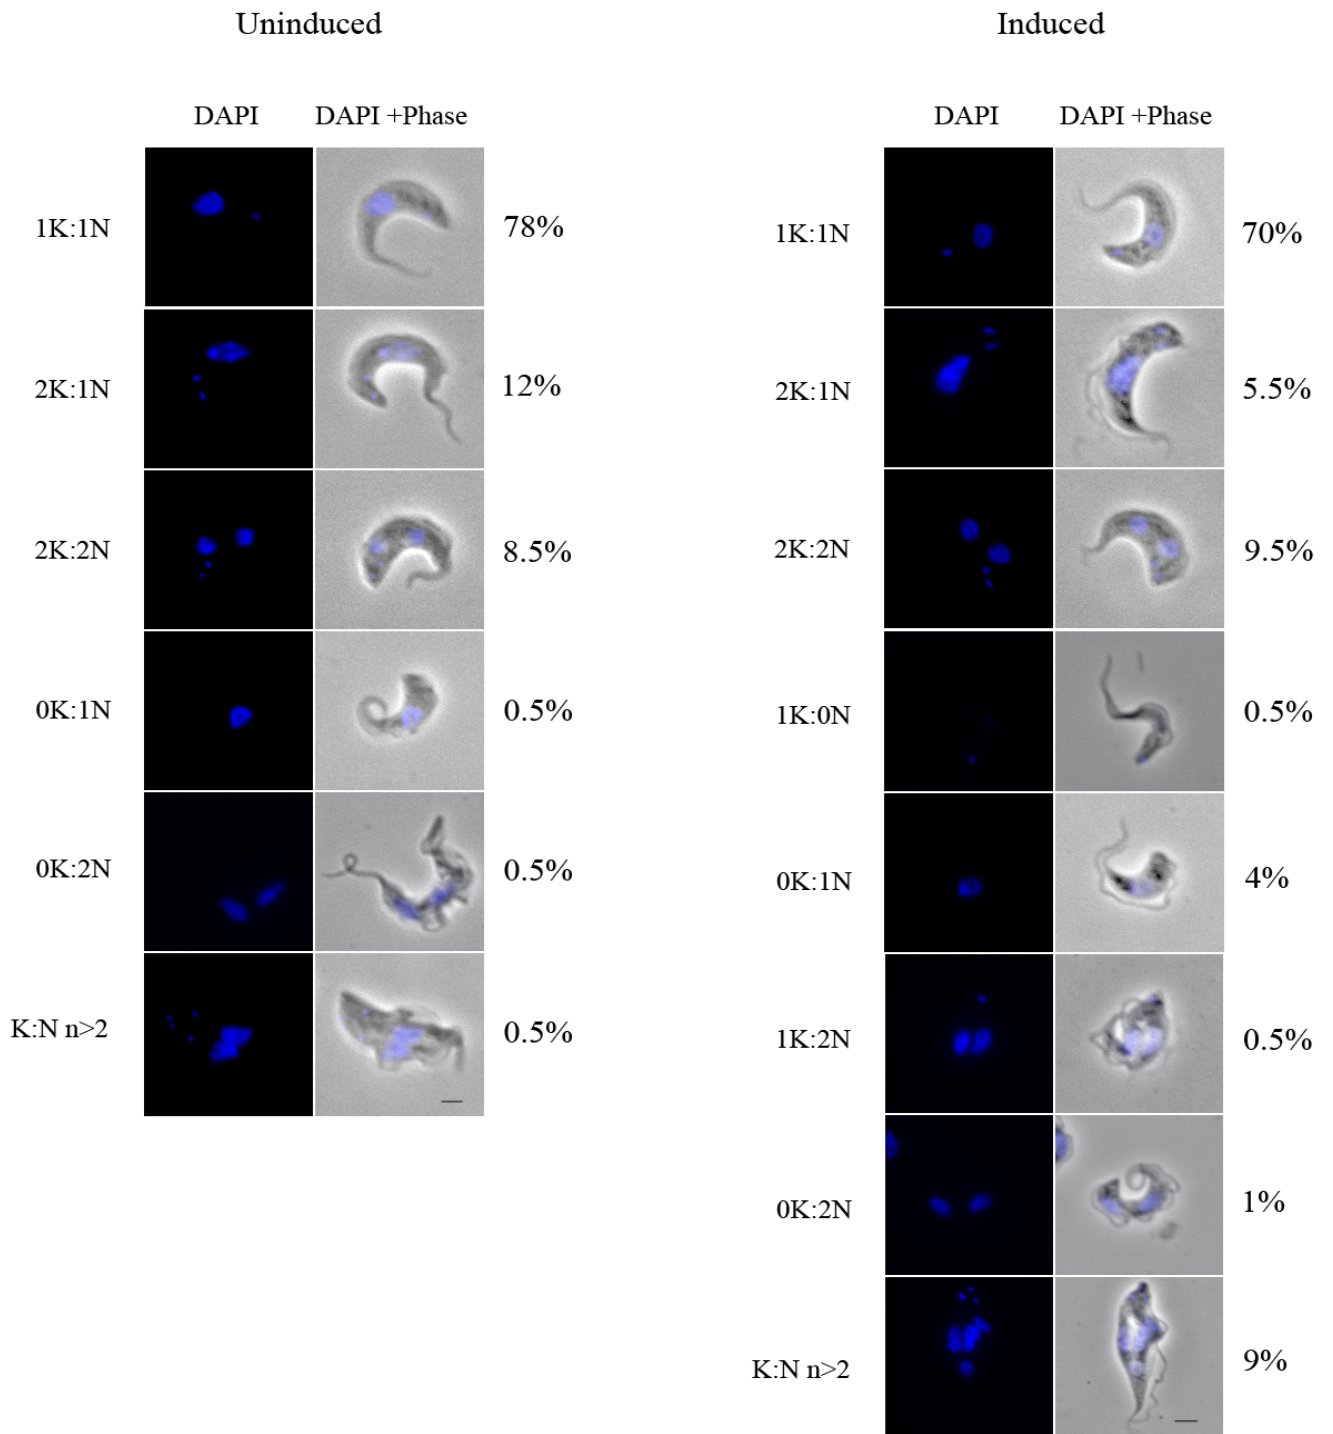

Figure S5

Figure S6

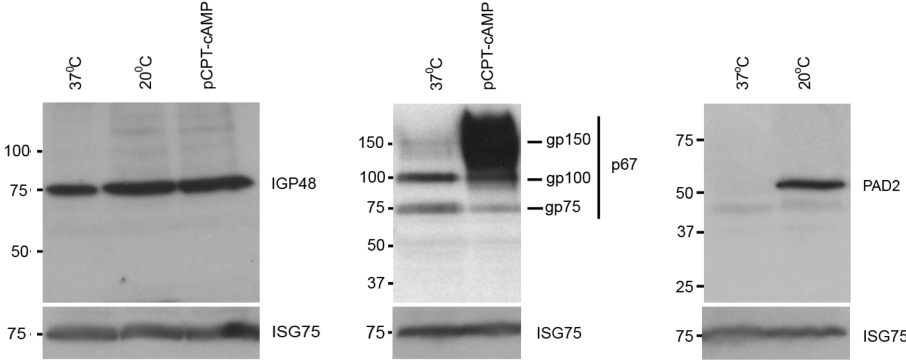

Figure S7

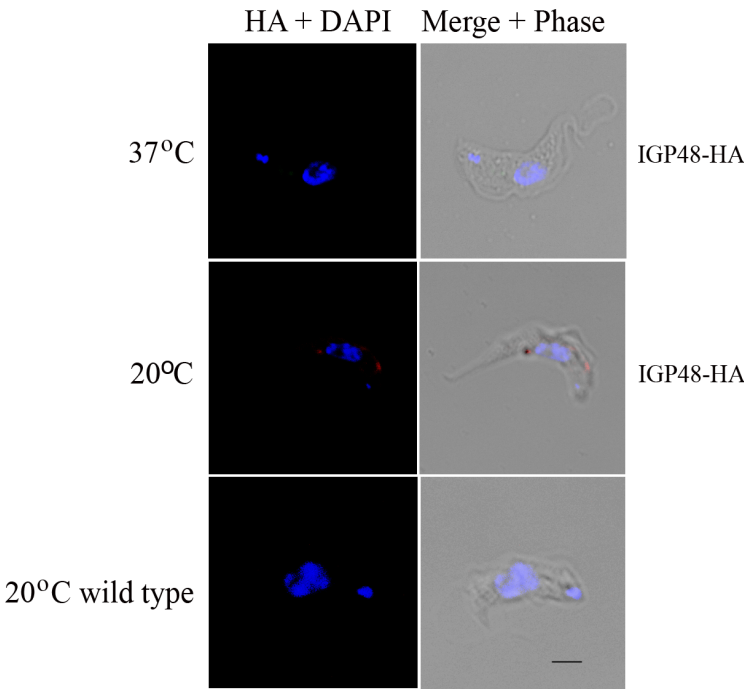

Figure S8

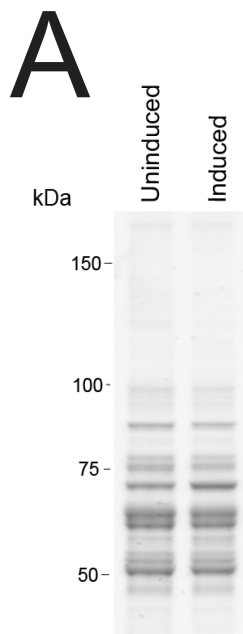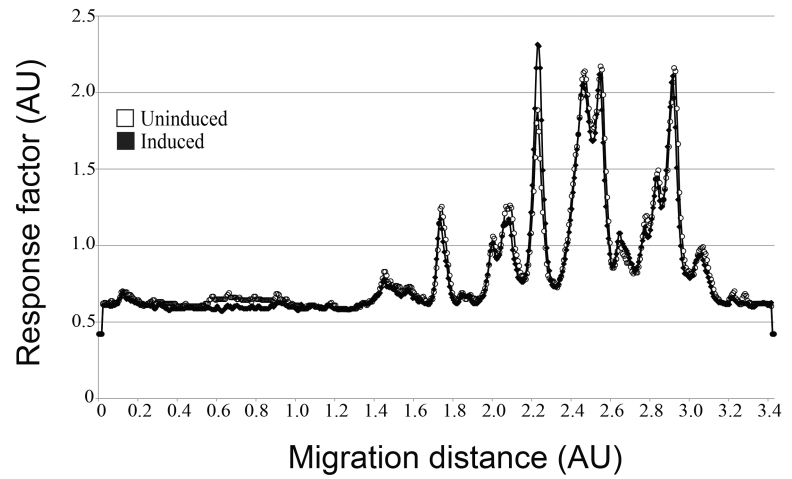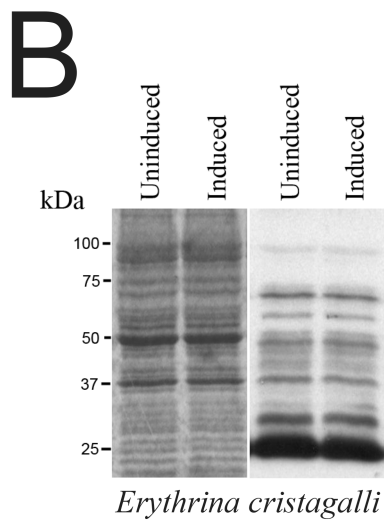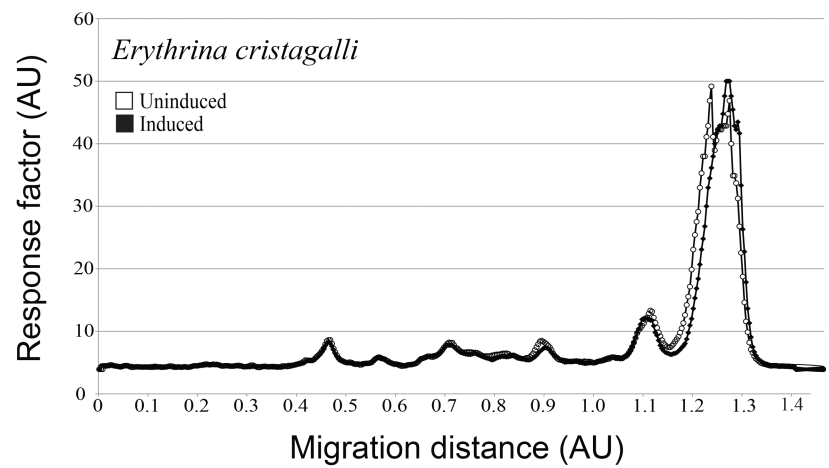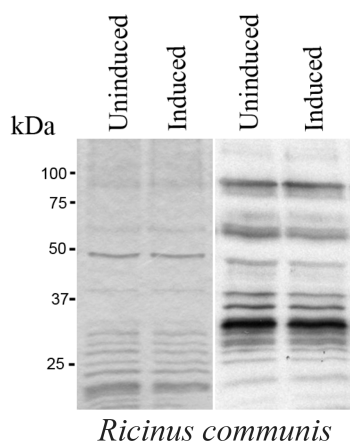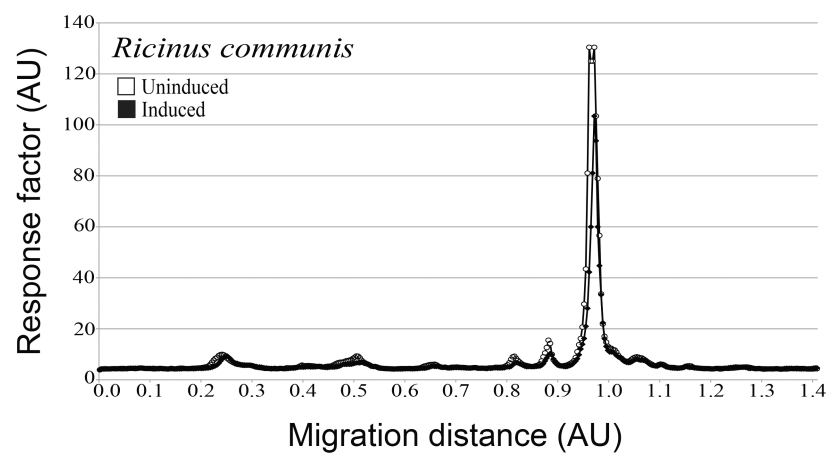

Figure S9

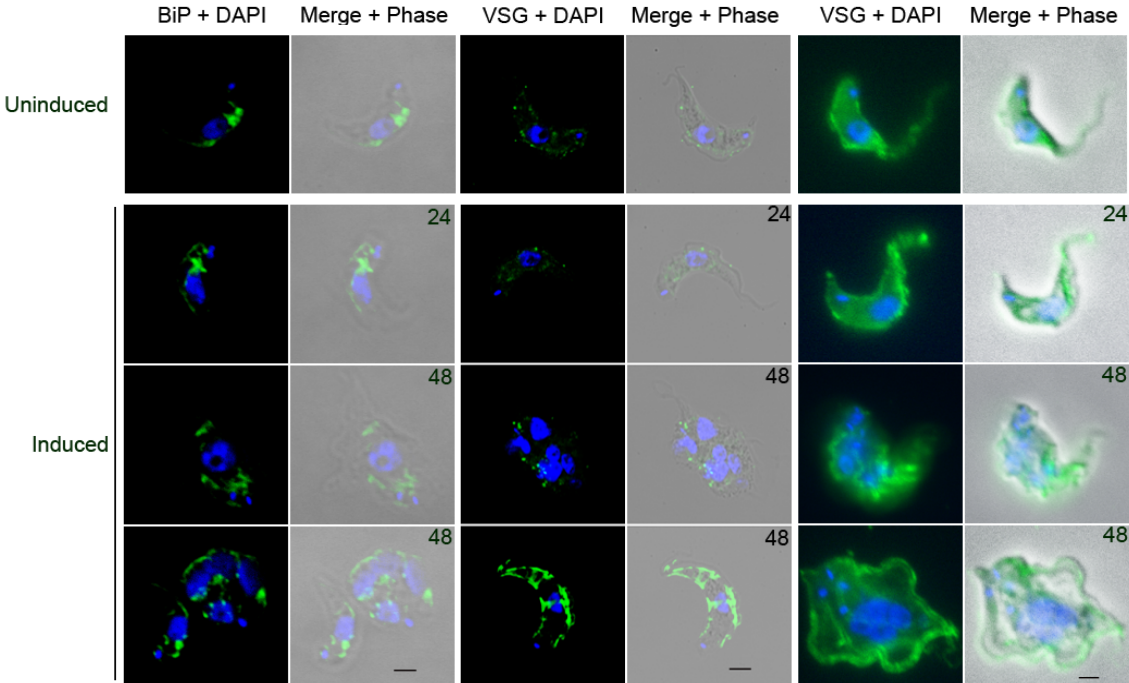

Figure S10

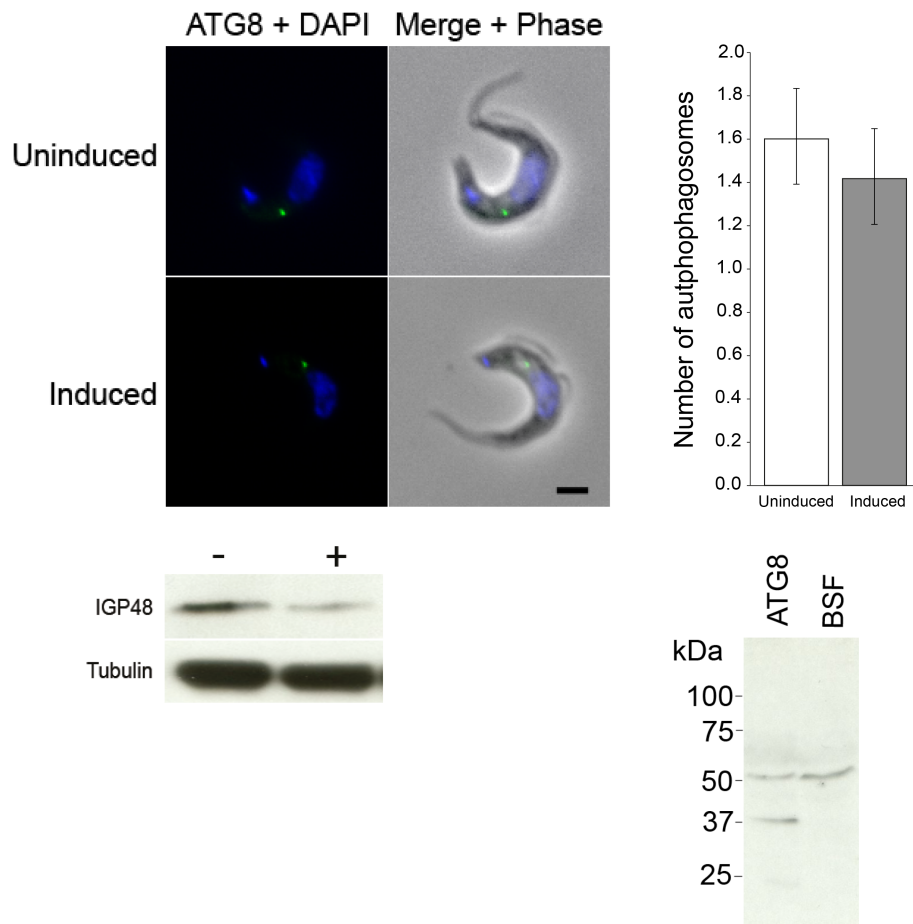



Table S1

| Oligomers                           | Sequence                                                              | Restriction site | Epitope tag |
|-------------------------------------|-----------------------------------------------------------------------|------------------|-------------|
| <i>RNAi knock-down confirmation</i> |                                                                       |                  |             |
| IGP48:FP                            | GCCGGTGCTGCTGTTGTTA                                                   | -                | -           |
| IGP48:RP                            | ATACGGGTGAGGTAACCTTTT                                                 | -                | -           |
| IGP40:FP                            | TTGTGTGTATCGTTGGAATAAG                                                | -                | -           |
| IGP40:RP                            | AGGATGGGTAACCATTTCATTG                                                | -                | -           |
| IGP34:FP                            | CTCAAGATCAACCTTCGGCAA                                                 | -                | -           |
| IGP34:RP                            | GCACACAATTGCGAGGGAAA                                                  | -                | -           |
| <i>Localisation</i>                 |                                                                       |                  |             |
| IGP48-CO <sub>2</sub> H:FP          | CTCGAAA <b>AAGCTT</b> ATGGAAATCCGCATGGTGCCA                           | HindIII          | -           |
| IGP48-CO <sub>2</sub> H:RP (HA)     | TGCTAT <b>CCCGGG</b> TCAAGCGTAATCTGGAACATCGTATGGGTACTCATCAGCTGCTGGAGT | SmaI             | HA          |
| IGP48-CO <sub>2</sub> H:RP (FLAG)   | AGCCAT <b>GGATCCT</b> CACTTGTTCGTCATCGTCTTTGTAGTCTCATCAGCTGCTGGAGTTTC | BamHI            | FLAG        |
| IGP48-65:RP                         | ACTATCAAAGTCGGCACCACCGCCACTTCCCTC                                     | -                | -           |
| 48-ISG65:FP                         | GGCGGTGGTGCCGACTTTGATAGTCTCCTAGAT                                     | -                | -           |
| ISG65:RP                            | GCCAC <b>CCCGGG</b> TCAAGCGTAATCTGGAACATCGTATGGGTACTACTTTTACGCTAGA    | SmaI             | HA          |
| BiP-IGP48:FP                        | GCGGCC <b>GCTAGC</b> AGTAATGAAGCATCAGATAAG                            | NheI             | -           |
| BiP-IGP48:RP                        | TGCCTT <b>GAATTC</b> CACTCATCAGCTGCTGG                                | EcoRI            | -           |
| IGP40-CO <sub>2</sub> H:FP          | GCTAT <b>GAAGCTT</b> ATGAGCATGGACACCCGT                               | HindIII          | -           |
| IGP40-CO <sub>2</sub> H:RP          | ACTGCAC <b>CCCGGG</b> TTAAGCGTAATCTGGAACATCGTATGGGTATTCACTGGTTCTCATTG | SmaI             | HA          |
| IGP40-65: RP                        | ACTATCAAAGTCGTGCCAATTACTTCTCTTTC                                      | -                | -           |
| 40-ISG65:FP                         | AGTAATTGGCACGACTTTGATAGTCTCCTAGAT                                     | -                | -           |
| BiP-IGP40:FP                        | GCAGAT <b>GCTAGC</b> GAAGTACCGGAACCAACTGTG                            | NheI             | -           |
| BiP-IGP40:RP                        | GACCTA <b>GAATTC</b> TATTCACTGGTTCTCATTG                              | EcoRI            | -           |
| dCLECT:FP                           | TCTATT <b>GCTAGC</b> CCAACCTCCGCTTCCACCTGCT                           | NheI             | -           |
| dCLECT:RP                           | TGCCTT <b>GAATTC</b> CACTCATCAGCTGCTGG                                | EcoRI            | -           |
| dTRIM:FP                            | ATCGT <b>GAATTC</b> GTGCCATCTACAGCTTCCGAT                             | EcoRI            | -           |
| dTRIM:RP                            | GTACAT <b>GAATTC</b> AGCAGGTGGAAGCGGAGTTGG                            | EcoRI            | -           |
| Supplementary Table S1              |                                                                       |                  |             |

Table S2

| <b>Accession Number</b> | <b>Description</b> | <b>Accession Number</b> |
|-------------------------|--------------------|-------------------------|
| Tb927.5.390             | ISG75              | Tb09.v4.0147            |
| Tb927.5.390b            | ISG75              | Tb09.v4.0146            |
| Tb927.5.360             | ISG75              | Tb09.v4.0148            |
| Tb927.5.360b            | ISG75              | Tb09.160.1520           |
| Tb927.5.370             | ISG75              | Tb09.v4.0149            |
| Tb927.5.370b            | ISG75              | Tb09.v4.0058            |
| Tb927.5.350b            | ISG75              | Tb09.v4.0059            |
| Tb927.5.350             | ISG75              | Tb09.v4.0060            |
| Tb927.5.400             | ISG75              |                         |
| Tb927.5.400b            | ISG75              | Tb927.2.4920            |
| Tb927.5.380             | ISG75              | Tb927.2.4760            |
| Tb927.5.380b            | ISG75              | Tb927.2.5330            |
|                         |                    | Tb927.2.5340            |
|                         |                    | Tb927.2.5360            |
| <b>Accession Number</b> | <b>Description</b> | Tb927.2.5350            |
| Tb927.6.1850            | Singleton          | Tb927.2.5290            |
| Tb09.160.4230           | Singleton          | Tb927.2.5300            |
| Tb11.01.4701            | Singleton          | Tb927.2.5310            |
| Tb927.10.7140           | Singleton          | Tb927.2.5320            |
| Tb11.01.5310            | Singleton          |                         |
| Tb09.160.1390           | Singleton          | Tb927.6.380             |
| Tb09.v1.0780            | Singleton          | Tb927.6.370             |
| Tb927.8.4110            | Singleton          |                         |
| Tb927.8.4060            | Singleton          |                         |
| Tb927.8.4010            | Singleton          | <b>Accession Number</b> |
| Tb11.01.3590            | Singleton          | Tb927.5.1430            |
| Tb09.160.3680           | Singleton          | Tb927.5.1390            |
| Tb927.2.1700            | Singleton          | Tb927.5.1410            |
| Tb927.2.1760            | Singleton          | Tb927.5.420b            |
| Tb11.57.0077            | Singleton          | Tb927.5.420             |
| Tb09.v4.0152            | Singleton          | Tb927.5.430b            |
| Tb11.1460               | Singleton          | Tb927.5.430             |
| Tb11.v4.0022            | Singleton          | Tb927.5.410             |
| Tb927.7.4280            | Singleton          | Tb927.5.410b            |
| Tb927.7.4230            | Singleton          | Tb927.5.310             |

|                |           |              |
|----------------|-----------|--------------|
| Tb927.7.4260   | Singleton | Tb927.5.310b |
| Tb927.5.440b   | Singleton |              |
| Tb927.5.440    | Singleton |              |
| Tb09.v1.0510   | Singleton |              |
| Tb09.v1.0540   | Singleton |              |
| Tb927.7.4270   | Singleton |              |
| Tb927.10.6180  | Singleton |              |
| Tb11.01.3610   | Singleton |              |
| Tb927.5.610    | ISG-like  |              |
| Tb927.5.620    | ISG-like  |              |
| Tb927.5.630    | ISG-like  |              |
| Tb927.10.2360  | Singleton |              |
| Tb11.1490      | Singleton |              |
| Tb927.10.120   | Singleton |              |
| Tb927.3.2870   | Singleton |              |
| Tb927.10.11140 | Singleton |              |
| Tb09.160.2060  | Singleton |              |
| Tb927.1.3900   | Singleton |              |
| Tb11.47.0001   | Singleton |              |
| Tb927.1.660    | Singleton |              |
| Tb927.3.5170   | Singleton |              |
| Tb927.1.770    | Singleton |              |
| Tb09.v4.0010   | Singleton |              |
| Tb927.8.8030   | Singleton |              |
| Tb927.8.7280   | Singleton |              |
| Tb09.160.4390  | Singleton |              |
| Tb927.6.1740   | Singleton |              |
| Tb927.1.4770   | Singleton |              |
| Tb927.3.4230   | Singleton |              |
| Tb09.160.4810  | Singleton |              |
| Tb09.v1.0630   | Singleton |              |
| Tb927.4.590    | Singleton |              |
| Tb927.10.2080  | Singleton |              |
| Tb927.8.3120   | Singleton |              |
| Tb927.5.1810   | Singleton |              |
| Tb11.01.0290   | Singleton |              |

|                |           |  |
|----------------|-----------|--|
| Tb927.8.6380   | Singleton |  |
| Tb927.5.4060   | Singleton |  |
| Tb927.4.2320   | Singleton |  |
| Tb09.160.5140  | Singleton |  |
| Tb927.5.2580   | Singleton |  |
| Tb11.13.0007   | Singleton |  |
| Tb927.10.2420  | Singleton |  |
| Tb09.160.2950  | Singleton |  |
| Tb09.v1.0650   | Singleton |  |
| Tb09.160.2340  | Singleton |  |
| Tb927.10.10840 | Singleton |  |
| Tb09.211.4290  | Singleton |  |
| Tb09.160.2140  | Singleton |  |
| Tb927.4.1120   | Singleton |  |
| Tb927.10.12450 | Singleton |  |
| Tb927.3.840    | Singleton |  |
| Tb927.7.5710   | Singleton |  |
| Tb11.02.2880   | Singleton |  |
| Tb09.160.5040  | Singleton |  |
| Tb927.4.1390   | Singleton |  |
| Tb11.02.3760   | Singleton |  |
| Tb09.211.2890  | Singleton |  |
| Tb10.v4.0132   | Singleton |  |
| Tb927.10.10760 | Singleton |  |
| Tb927.3.2360   | Singleton |  |
| Tb927.7.900    | Singleton |  |
| Tb09.v4.0150   | Singleton |  |
| Tb09.v2.0050   | Singleton |  |
| Tb927.5.1020   | Singleton |  |
| Tb927.3.3140   | Singleton |  |
| Tb927.8.560    | Singleton |  |
| Tb927.2.6390   | Singleton |  |
| Tb927.4.5470   | Singleton |  |
| Tb927.10.13090 | Singleton |  |
| Tb927.2.5970   | Singleton |  |
| Tb927.5.1740   | Singleton |  |

|               |           |  |
|---------------|-----------|--|
| Tb927.7.470   | Singleton |  |
| Tb11.01.1000  | Singleton |  |
| Tb09.v1.0850  | Singleton |  |
| Tb09.211.4680 | Singleton |  |
| Tb927.10.700  | Singleton |  |
| Tb11.02.0780  | Singleton |  |
| Tb09.211.4770 | Singleton |  |
| Tb927.6.4500  | Singleton |  |
| Tb11.01.7770  | Singleton |  |
| Tb927.4.4920  | Singleton |  |
| Tb11.01.3160  | Singleton |  |
| Tb927.8.6590  | Singleton |  |
| Tb927.4.510   | Singleton |  |
| Tb11.01.3790  | Singleton |  |
| Tb11.49.0009  | Singleton |  |
| Tb11.30.0008  | Singleton |  |
| Tb09.v4.0179  | Singleton |  |
| Tb10.v4.0122  | Singleton |  |
| Tb09.142.0500 | Singleton |  |
| Tb11.02.0060  | Singleton |  |
| Tb927.10.2500 | Singleton |  |
| Tb05.5K5.520  | Singleton |  |
| Tb927.10.4670 | Singleton |  |
| Tb927.5.292b  | Singleton |  |
| Tb927.2.2490  | Singleton |  |
| Tb927.7.4690  | Singleton |  |
| Tb11.v4.0065  | Singleton |  |
| Tb927.4.1190  | Singleton |  |
| Tb927.6.3700  | Singleton |  |
| Tb927.7.4980  | Singleton |  |
| Tb927.10.6640 | Singleton |  |
| Tb927.5.1630  | Singleton |  |
| Tb927.10.7000 | Singleton |  |
| Tb927.10.7180 | Singleton |  |

| <b>Description</b> | <b>Accession Number</b> | <b>Description</b> |
|--------------------|-------------------------|--------------------|
| IGP48              | Tb927.2.3300            | ISG65              |
| IGP48              | Tb927.2.3290            | ISG65              |
| IGP48              | Tb927.2.3310            | ISG65              |
| IGP48              | Tb927.2.3280            | ISG65              |
| IGP48              | Tb927.2.3270            | ISG65              |
| IGP48              | Tb927.2.3320            | ISG65              |
| IGP48              |                         |                    |
| IGP48              |                         |                    |
|                    | <b>Accession Number</b> | <b>Description</b> |
| IGP40              | Tb927.8.7920            | Adenylate Cyclase  |
| IGP40              | Tb927.8.7900            | Adenylate Cyclase  |
| IGP40              | Tb927.8.7890            | Adenylate Cyclase  |
| IGP40              | Tb927.8.7930            | Adenylate Cyclase  |
| IGP40              | Tb927.8.7870            | Adenylate Cyclase  |
| IGP40              | Tb927.8.7940            | Adenylate Cyclase  |
| IGP40              | Tb927.8.7590            | Adenylate Cyclase  |
| IGP40              | Tb927.4.4430            | Adenylate Cyclase  |
| IGP40              | Tb927.4.4450            | Adenylate Cyclase  |
| IGP40              | Tb927.4.4410            | Adenylate Cyclase  |
|                    | Tb927.4.4440            | Adenylate Cyclase  |
| IGP34              | Tb927.7.7530            | Adenylate Cyclase  |
| IGP34              | Tb927.7.7520            | Adenylate Cyclase  |
|                    | Tb927.4.4470            | Adenylate Cyclase  |
|                    | Tb927.4.4460            | Adenylate Cyclase  |
| <b>Description</b> | Tb927.4.3880            | Adenylate Cyclase  |
| ISG-like           | Tb927.4.3870            | Adenylate Cyclase  |
| ISG-like           | Tb927.4.3750            | Adenylate Cyclase  |
| ISG-like           | Tb927.6.190             | Adenylate Cyclase  |
| ISG-like           | Tb927.5.650             | Adenylate Cyclase  |
| ISG-like           | Tb927.7.6040            | Adenylate Cyclase  |
| ISG-like           | Tb927.7.6080            | Adenylate Cyclase  |
| ISG-like           | Tb927.7.6070            | Adenylate Cyclase  |
| ISG-like           | Tb927.7.6060            | Adenylate Cyclase  |
| ISG-like           | Tb927.7.6050            | Adenylate Cyclase  |
| ISG-like           | Tb927.10.13040          | Adenylate Cyclase  |



**Table S3: Serum immunoglobulin responses to IGP48 in *T. b. rhodesiense* patients.**

|            | Patient ID | IgG response to rIGP48 (+/-) | IgM response to rIGP48 (+/-) | Disease stage | Age (years) | Parasitaemia | Serum IgG (g/l) | Serum IgM (g/l) |
|------------|------------|------------------------------|------------------------------|---------------|-------------|--------------|-----------------|-----------------|
| INFECTED   |            |                              |                              |               |             |              |                 |                 |
|            | L2         | -                            | -                            | Late          | 12          | 0.25         | 20.5            | 9.4             |
|            | L3         | +                            | -                            | Late          | 15          | 1            | 30.1            | 10.2            |
|            | L16        | +                            | +                            | Early         | 40          | 20           | 25.2            | 21.7            |
|            | L30        | +                            | -                            | Late          | 18          | 3            | 45.3            | 7.6             |
|            | S3         | -                            | -                            | Late          | 12          | 0            | 17.3            | 5.7             |
|            | S13        | +                            | -                            | Early         | 16          | 50           | 16.6            | 1.3             |
|            | S48        | +                            | +                            | Late          | 40          | 100          | 3.1             | 18.8            |
|            | S69        | +                            | +                            | Early         | 15          | 20           | 51.3            | 2.7             |
|            | S79        | +                            | -                            | Late          | 50          | 2            | 17.8            | 51.6            |
| UNINFECTED |            |                              |                              |               |             |              |                 |                 |
|            | LC1        | -                            | -                            | N/A           |             |              |                 |                 |
|            | LC15       | -                            | -                            |               |             |              |                 |                 |
|            | EUM1       | -                            | -                            |               |             |              |                 |                 |
|            | EUF1       | -                            | -                            |               |             |              |                 |                 |

a: Disease stage: Later stage (meningoencephalitic) criteria either CSF white cells  $>5/\text{mm}^3$  or parasites observed in the CSF.

b: Parasitaemia: Number of Giemsa stained parasites observed per 10 fields, at 400x magnification.
